# Supplementary material for: Full genome sequence for the African swine fever virus outbreak in the Dominican Republic in 1980
Source: PubMed Central journal article supplement (PMC9852453; doi:10.1038/s41598-022-25987-5), 2023-01-19
Supplement: 41598_2022_25987_MOESM1_ESM.pdf [file 41598_2022_25987_MOESM1_ESM.pdf]

# CP2475L Alignment

|                      | 20          | 40         | 60         | 80         |            |            |            |            |     |
|----------------------|-------------|------------|------------|------------|------------|------------|------------|------------|-----|
| CP2475L_DR-1980      | MGNRRGSSTSS | RPPLSSEANL | YAKLQDHIQR | QTRPFSGGGY | FNGGGDKNPV | QHIKDYHIDS | VSSKAKLRVI | EGIIIRAIKI | 80  |
| LO2018_minor         | .....       | .....      | .....      | .....      | .....      | .....      | .....      | .....      | 80  |
| 31479_2015           | .....       | .....      | .....      | .....      | .....      | .....      | .....      | .....      | 80  |
| OR1984               | .....       | .....      | .....      | .....      | .....      | .....      | .....      | .....      | 80  |
| Benin_97/1           | .....       | .....      | .....      | .....      | .....      | .....      | .....      | .....      | 80  |
| 15998_2015           | .....       | .....      | .....      | .....      | .....      | .....      | I.....     | .....      | 80  |
| Pig/SD/DY-I/2021     | .....       | .....      | .....      | .....      | .....      | .....      | .....      | .....      | 80  |
| Warmbaths            | .....       | P.....     | I.....     | .....      | .....      | .....      | .....      | I.....     | 80  |
| Mkuzi_1979           | .....       | P.....     | I.....     | .....      | .....      | .....      | .....      | I.....     | 80  |
| Tengani_62           | .....       | I.....     | I.....     | .....      | .....      | .....      | .....      | I.....     | 80  |
| ASFV-G               | .....       | LP.....    | I.....     | .....      | .....      | .....      | .....      | I.....     | 80  |
| Ulyanovsk_19/WB-5699 | .....       | LP.....    | I.....     | .....      | .....      | .....      | .....      | I.....     | 80  |
| Hub20                | .....       | LP.....    | I.....     | .....      | .....      | .....      | .....      | I.....     | 80  |
| Pretorisuskop/96/4   | .....       | P.....     | I.....     | .....      | .....      | .....      | .....      | I.....     | 80  |
| Warthog              | .....       | P.....     | I.....     | .....      | .....      | .....      | .....      | I.....     | 80  |
| K49                  | .....       | .....      | .....      | .....      | .....      | .....      | .....      | .....      | 80  |
| OmLF2                | .....       | LP.....    | I.....     | .....      | .....      | .....      | .....      | I.....     | 80  |
| Malawi_Lil-20/1      | .....       | .....      | I.....     | .....      | .....      | .....      | .....      | I.....     | 80  |
| Ken05/Tk1            | .....       | .....      | .....      | A.....     | .....      | .....      | .....      | I.....     | 80  |
| Kenya_1950           | .....       | .....      | .....      | .....      | .....      | .....      | .....      | I.....     | 80  |
| Ken.riel             | .....       | T.....     | .....      | .....      | .....      | .....      | .....      | I.....     | 80  |
| Uvira_B53            | .....       | .....      | .....      | .....      | .....      | .....      | .....      | I.....     | 80  |
| Ken06.Bus            | .....       | .....      | .....      | S.....     | .....      | .....      | .....      | I.....     | 80  |
| N10                  | .....       | .....      | .....      | S.....     | .....      | .....      | .....      | I.....     | 80  |
| Conservation         |             |            |            |            |            |            |            |            | 80  |
|                      | 100         | 120        | 140        | 160        |            |            |            |            |     |
| CP2475L_DR-1980      | GFKVDTKQPI  | EDILKDIKKQ | LPDPRAGSTF | VKNAEKQETV | CKMIADAINQ | EFIDLGQDKL | IDTTDGAASI | CRQIVLYINS | 160 |
| LO2018_minor         | .....       | .....      | .....      | .....      | .....      | .....      | .....      | .....      | 160 |
| 31479_2015           | .....       | .....      | .....      | .....      | .....      | .....      | .....      | .....      | 160 |
| OR1984               | .....       | .....      | .....      | .....      | .....      | .....      | .....      | .....      | 160 |
| Benin_97/1           | .....       | .....      | .....      | .....      | .....      | .....      | .....      | .....      | 160 |
| 15998_2015           | .....       | .....      | .....      | .....      | .....      | .....      | .....      | .....      | 160 |
| Pig/SD/DY-I/2021     | .....       | .....      | .....      | .....      | .....      | .....      | .....      | L.....     | 160 |
| Warmbaths            | .....       | .....      | .....      | .....      | .....      | .....      | .....      | .....      | 160 |
| Mkuzi_1979           | .....       | .....      | .....      | .....      | .....      | .....      | .....      | .....      | 160 |
| Tengani_62           | .....       | .....      | .....      | .....      | .....      | .....      | .....      | E.....     | 160 |
| ASFV-G               | .....       | .....      | .....      | .....      | .....      | .....      | .....      | E.....     | 160 |
| Ulyanovsk_19/WB-5699 | .....       | .....      | .....      | .....      | .....      | .....      | .....      | E.....     | 160 |
| Hub20                | .....       | .....      | .....      | .....      | .....      | .....      | .....      | E.....     | 160 |
| Pretorisuskop/96/4   | .....       | .....      | .....      | .....      | .....      | .....      | .....      | E.....     | 160 |
| Warthog              | .....       | .....      | .....      | .....      | .....      | .....      | .....      | E.....     | 160 |
| K49                  | .....       | .....      | .....      | .....      | .....      | .....      | .....      | .....      | 160 |
| OmLF2                | .....       | .....      | .....      | .....      | .....      | .....      | .....      | .....      | 160 |
| Malawi_Lil-20/1      | .....       | I.....     | .....      | .....      | .....      | .....      | .....      | E.....     | 160 |
| Ken05/Tk1            | .....       | .....      | .....      | I.....     | .....      | .....      | .....      | E.....     | 160 |
| Kenya_1950           | .....       | .....      | .....      | I.....     | .....      | .....      | .....      | E.....     | 160 |
| Ken.riel             | .....       | .....      | .....      | I.....     | .....      | .....      | .....      | E.....     | 160 |
| Uvira_B53            | .....       | .....      | .....      | I.....     | .....      | .....      | .....      | E.....     | 160 |
| Ken06.Bus            | .....       | .....      | .....      | I.....     | .....      | .....      | .....      | E.....     | 160 |
| N10                  | .....       | .....      | .....      | I.....     | .....      | .....      | .....      | E.....     | 160 |
| Conservation         |             |            |            |            |            |            |            |            | 160 |
|                      | 180         | 200        | 220        | 240        |            |            |            |            |     |
| CP2475L_DR-1980      | LTHGLRAEYL  | DVHGSIENTL | ENIKLLNDAI | KQLHERMVTE | VTKAAPNEEV | INAVTMIEAV | YRRLLEQNQL | QINILTNFID | 240 |
| LO2018_minor         | .....       | .....      | .....      | .....      | .....      | .....      | .....      | .....      | 240 |
| 31479_2015           | .....       | .....      | .....      | .....      | .....      | .....      | .....      | .....      | 240 |
| OR1984               | .....       | .....      | .....      | .....      | .....      | .....      | .....      | .....      | 240 |
| Benin_97/1           | .....       | .....      | .....      | .....      | .....      | .....      | .....      | .....      | 240 |
| 15998_2015           | .....       | .....      | .....      | .....      | .....      | .....      | .....      | .....      | 240 |
| Pig/SD/DY-I/2021     | .....       | .....      | .....      | .....      | .....      | .....      | .....      | .....      | 240 |
| Warmbaths            | .....       | .....      | .....      | .....      | .....      | .....      | .....      | .....      | 240 |
| Mkuzi_1979           | .....       | .....      | .....      | .....      | .....      | .....      | .....      | .....      | 240 |
| Tengani_62           | .....       | .....      | .....      | .....      | .....      | .....      | .....      | .....      | 240 |
| ASFV-G               | .....       | .....      | .....      | .....      | .....      | .....      | .....      | .....      | 240 |
| Ulyanovsk_19/WB-5699 | .....       | .....      | .....      | .....      | .....      | .....      | .....      | .....      | 240 |
| Hub20                | .....       | .....      | .....      | .....      | .....      | .....      | .....      | .....      | 240 |
| Pretorisuskop/96/4   | .....       | .....      | .....      | .....      | .....      | .....      | .....      | .....      | 240 |
| Warthog              | .....       | .....      | .....      | .....      | .....      | .....      | .....      | .....      | 240 |
| K49                  | .....       | .....      | .....      | .....      | .....      | .....      | .....      | .....      | 240 |
| OmLF2                | .....       | .....      | .....      | .....      | .....      | P.....     | .....      | .....      | 240 |
| Malawi_Lil-20/1      | .....       | .....      | .....      | .....      | .....      | .....      | .....      | S.....     | 240 |
| Ken05/Tk1            | .....       | .....      | .....      | S.....     | .....      | .....      | .....      | .....      | 240 |
| Kenya_1950           | .....       | .....      | .....      | S.....     | .....      | .....      | .....      | .....      | 240 |
| Ken.riel             | .....       | .....      | .....      | S.....     | .....      | .....      | .....      | .....      | 240 |
| Uvira_B53            | .....       | .....      | .....      | S.....     | .....      | .....      | .....      | .....      | 240 |
| Ken06.Bus            | .....       | .....      | .....      | S.....     | .....      | .....      | .....      | .....      | 240 |
| N10                  | .....       | .....      | .....      | S.....     | .....      | .....      | .....      | .....      | 240 |
| Conservation         |             |            |            |            |            |            |            |            | 240 |

# CP2475L Alignment

|                      | 260                                                               | 280                                                      | 300                                                      | 320                                                              |     |
|----------------------|-------------------------------------------------------------------|----------------------------------------------------------|----------------------------------------------------------|------------------------------------------------------------------|-----|
| CP2475L_DR-1980      | NILTP <b>TQ</b> KEL DKL <b>QT</b> DEV <b>DI</b>                   | IKLL <b>ND</b> TNSV LGTK <b>NF</b> GKVL                  | SYTL <b>CN</b> LGIA ASV <b>ANK</b> INKA                  | LQKV <b>GL</b> KVEQ YLQ <b>SKN</b> WAE <b>F</b>                  | 320 |
| LO2018_minor         | .....                                                             | .....                                                    | .....                                                    | .....                                                            | 320 |
| 31479_2015           | .....                                                             | .....                                                    | .....                                                    | .....                                                            | 320 |
| OR1984               | .....                                                             | .....                                                    | .....                                                    | .....                                                            | 320 |
| Benin_97/1           | .....                                                             | .....                                                    | .....                                                    | .....                                                            | 320 |
| 15998_2015           | .....                                                             | .....                                                    | .....                                                    | .....                                                            | 320 |
| Pig/SD/DY-I/2021     | .....                                                             | .....                                                    | .....                                                    | .....                                                            | 320 |
| Warmbaths            | .....                                                             | .....                                                    | .....                                                    | .....                                                            | 320 |
| Mkuzi_1979           | .....                                                             | .....                                                    | .....                                                    | .....                                                            | 320 |
| Tengani_62           | .....                                                             | .....                                                    | .....                                                    | .....                                                            | 320 |
| ASFV-G               | .....                                                             | .....                                                    | .....                                                    | .....                                                            | 320 |
| Ulyanovsk_19/WB-5699 | .....                                                             | .....                                                    | .....                                                    | .....                                                            | 320 |
| HuB20                | .....                                                             | .....                                                    | .....                                                    | .....                                                            | 320 |
| Pretorisuskop/96/4   | .....                                                             | .....                                                    | .....                                                    | .....E.....                                                      | 320 |
| Warthog              | .....                                                             | .....                                                    | .....                                                    | .....                                                            | 320 |
| K49                  | .....                                                             | .....                                                    | .....                                                    | .....                                                            | 320 |
| OmLF2                | .....                                                             | .....                                                    | .....                                                    | .....                                                            | 320 |
| Malawi_Lil-20/1      | .....                                                             | .....                                                    | .....                                                    | .....R.....                                                      | 320 |
| Ken05/Tk1            | .....K.....                                                       | .....I.....                                              | .....T.....                                              | .....R.....H.....                                                | 320 |
| Kenya_1950           | .....K.....                                                       | .....I.....                                              | .....T.....                                              | .....R.....H.....                                                | 320 |
| Ken.riel             | .....K.....                                                       | .....I.....                                              | .....T.....                                              | .....R.....H.....                                                | 320 |
| Uvira_B53            | .....K.....                                                       | .....I.....                                              | .....T.....                                              | .....R.....H.....                                                | 320 |
| Ken06.Bus            | .....K.....                                                       | .....I.....                                              | .....T.....                                              | .....R.....H.....                                                | 320 |
| N10                  | .....K.....                                                       | .....I.....                                              | .....T.....                                              | .....R.....H.....                                                | 320 |
| Conservation         |                                                                   |                                                          |                                                          |                                                                  |     |
|                      | 340                                                               | 360                                                      | 380                                                      | 400                                                              |     |
| CP2475L_DR-1980      | D <b>KEL</b> DL <b>KRF</b> S GLV <b>SAE</b> NI <b>AE</b>          | FE <b>KAV</b> NLL <b>RQ</b> TF <b>NER</b> H <b>KIL</b> E | NS <b>CAK</b> KG <b>GDE</b> E <b>KTP</b> LD <b>RR</b> IE | A <b>QRL</b> DR <b>KHIL</b> M <b>EFL</b> N <b>KST</b> Q <b>A</b> | 400 |
| LO2018_minor         | .....                                                             | .....                                                    | .....                                                    | .....                                                            | 400 |
| 31479_2015           | .....                                                             | .....                                                    | .....                                                    | .....                                                            | 400 |
| OR1984               | .....                                                             | .....                                                    | .....                                                    | .....                                                            | 400 |
| Benin_97/1           | .....                                                             | .....                                                    | .....                                                    | .....                                                            | 400 |
| 15998_2015           | .....                                                             | .....                                                    | .....                                                    | .....                                                            | 400 |
| Pig/SD/DY-I/2021     | .....                                                             | .....                                                    | .....                                                    | .....                                                            | 400 |
| Warmbaths            | .....                                                             | .....                                                    | .....                                                    | .....                                                            | 400 |
| Mkuzi_1979           | .....                                                             | .....                                                    | .....                                                    | .....                                                            | 400 |
| Tengani_62           | .....                                                             | .....                                                    | .....                                                    | .....                                                            | 400 |
| ASFV-G               | .....                                                             | .....                                                    | .....                                                    | .....                                                            | 400 |
| Ulyanovsk_19/WB-5699 | .....                                                             | .....                                                    | .....                                                    | .....                                                            | 400 |
| HuB20                | .....                                                             | .....                                                    | .....                                                    | .....                                                            | 400 |
| Pretorisuskop/96/4   | .....                                                             | .....                                                    | .....                                                    | .....                                                            | 400 |
| Warthog              | .....                                                             | .....                                                    | .....                                                    | .....                                                            | 400 |
| K49                  | .....                                                             | .....                                                    | .....                                                    | .....                                                            | 400 |
| OmLF2                | .....                                                             | .....                                                    | .....                                                    | .....                                                            | 400 |
| Malawi_Lil-20/1      | .....                                                             | .....N.....                                              | .....V.....K.....                                        | .....                                                            | 400 |
| Ken05/Tk1            | .....                                                             | .....N.....                                              | .....K.....M.....                                        | .....                                                            | 400 |
| Kenya_1950           | .....                                                             | .....N.....                                              | .....G.....K.....M.....                                  | .....                                                            | 400 |
| Ken.riel             | .....                                                             | .....N.....                                              | .....K.....M.....                                        | .....                                                            | 400 |
| Uvira_B53            | .....K.....                                                       | .....N.....                                              | .....K.....M.....                                        | .....                                                            | 400 |
| Ken06.Bus            | .....                                                             | .....N.....                                              | .....K.....M.....                                        | .....                                                            | 400 |
| N10                  | .....                                                             | .....N.....                                              | .....K.....M.....                                        | .....T.....                                                      | 400 |
| Conservation         |                                                                   |                                                          |                                                          |                                                                  |     |
|                      | 420                                                               | 440                                                      | 460                                                      | 480                                                              |     |
| CP2475L_DR-1980      | Y <b>ND</b> FL <b>EN</b> V <b>KK</b> I <b>GIK</b> LV <b>KE</b> IA | L <b>TPN</b> IT <b>RL</b> RD ALS <b>RIN</b> DM <b>GT</b> | I <b>ALD</b> LS <b>LIG</b> F Y <b>TNAA</b> A <b>REER</b> | E <b>TFL</b> T <b>QF</b> MLV <b>KNV</b> L <b>EEQ</b> SK <b>I</b> | 480 |
| LO2018_minor         | .....                                                             | .....                                                    | .....                                                    | .....                                                            | 480 |
| 31479_2015           | .....                                                             | .....                                                    | .....                                                    | .....                                                            | 480 |
| OR1984               | .....                                                             | .....                                                    | .....                                                    | .....                                                            | 480 |
| Benin_97/1           | .....                                                             | .....                                                    | .....                                                    | .....                                                            | 480 |
| 15998_2015           | .....                                                             | .....                                                    | .....                                                    | .....                                                            | 480 |
| Pig/SD/DY-I/2021     | .....                                                             | .....                                                    | .....                                                    | .....                                                            | 480 |
| Warmbaths            | .....                                                             | .....                                                    | .....                                                    | .....                                                            | 480 |
| Mkuzi_1979           | .....                                                             | .....                                                    | .....                                                    | .....                                                            | 480 |
| Tengani_62           | .....                                                             | .....                                                    | .....                                                    | .....LT.....I.....T.....                                         | 480 |
| ASFV-G               | .....                                                             | .....                                                    | .....                                                    | .....LT.....I.....T.....                                         | 480 |
| Ulyanovsk_19/WB-5699 | .....                                                             | .....                                                    | .....                                                    | .....LT.....I.....T.....                                         | 480 |
| HuB20                | .....                                                             | .....                                                    | .....                                                    | .....LT.....I.....T.....                                         | 480 |
| Pretorisuskop/96/4   | .....                                                             | .....                                                    | .....                                                    | .....LT.....I.....T.....                                         | 480 |
| Warthog              | .....                                                             | .....                                                    | .....                                                    | .....LT.....I.....T.....                                         | 480 |
| K49                  | .....                                                             | .....                                                    | .....                                                    | .....LT.....I.....T.....                                         | 480 |
| OmLF2                | .....                                                             | .....                                                    | .....                                                    | .....LT.....I.....T.....                                         | 480 |
| Malawi_Lil-20/1      | .....                                                             | .....                                                    | .....                                                    | .....LT.....I.....T.....                                         | 480 |
| Ken05/Tk1            | .....M.....                                                       | .....K.....                                              | .....N.....                                              | .....I.....LT.....LA.....T.....                                  | 480 |
| Kenya_1950           | .....M.....                                                       | .....K.....                                              | .....N.....                                              | .....I.....LT.....LA.....T.....                                  | 480 |
| Ken.riel             | .....M.....                                                       | .....K.....                                              | .....N.....                                              | .....I.....LT.....LA.....T.....                                  | 480 |
| Uvira_B53            | .....M.....                                                       | .....K.....                                              | .....N.....                                              | .....I.....LT.....LA.....T.....                                  | 480 |
| Ken06.Bus            | .....M.....                                                       | .....K.....                                              | .....N.....                                              | .....I.....LT.....LA.....T.....                                  | 480 |
| N10                  | .....M.....                                                       | .....K.....                                              | .....N.....                                              | .....I.....LT.....LA.....T.....                                  | 480 |
| Conservation         |                                                                   |                                                          |                                                          |                                                                  |     |

# CP2475L Alignment

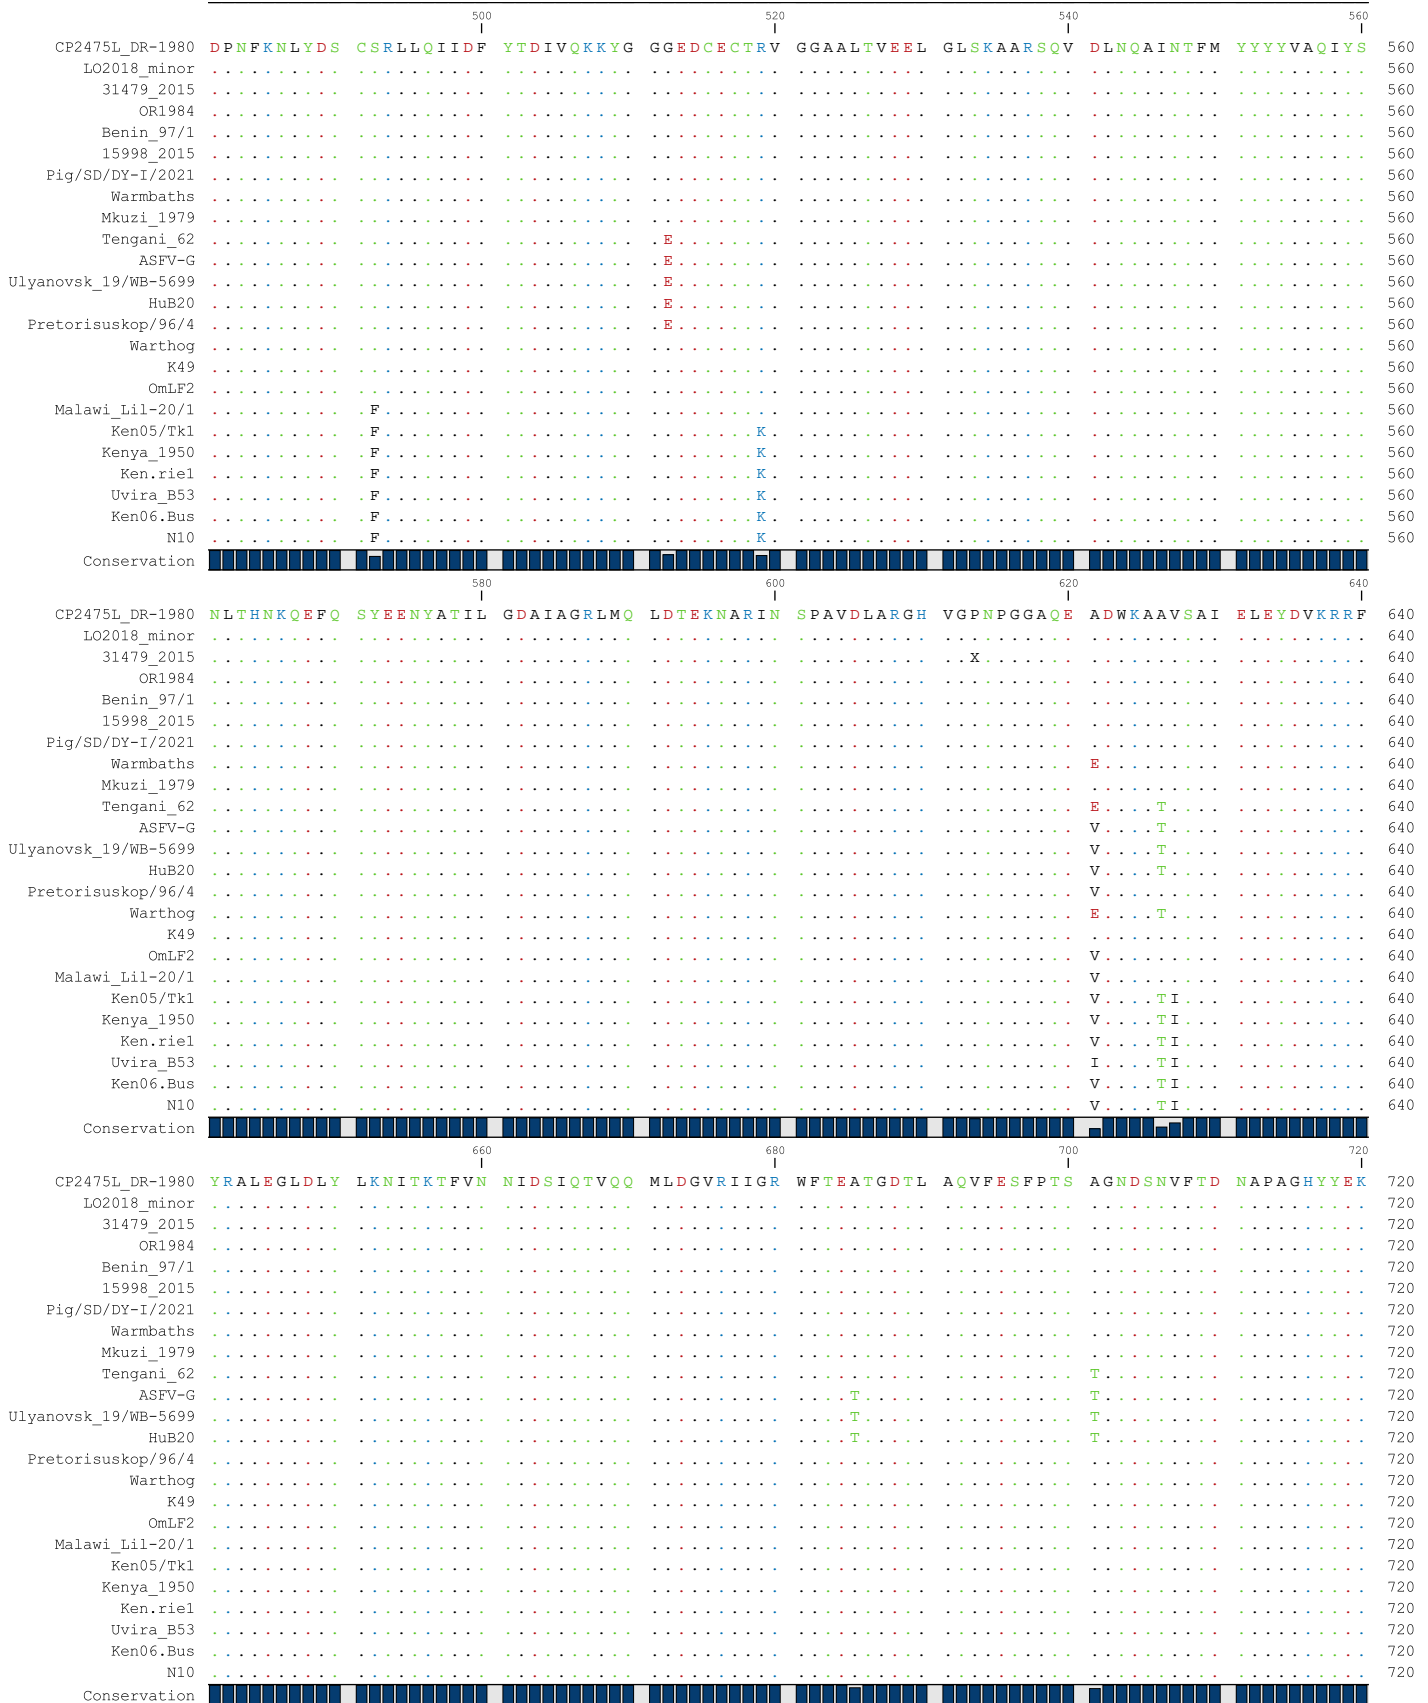

# CP2475L Alignment

|                      | 740        | 760        | 780         | 800         |            |            |            |             |     |
|----------------------|------------|------------|-------------|-------------|------------|------------|------------|-------------|-----|
| CP2475L_DR-1980      | VAAEIQQGRS | VGTLRPVRAS | QAKNIRDLLIG | RSLSNFQALK  | NIINAFARIG | DMLGGEELRQ | MVPMSPLQIY | KTLLLEYIQHS | 800 |
| LO2018_minor         | .....      | .....      | .....       | .....       | .....      | .....      | .....      | .....       | 800 |
| 31479_2015           | .....      | .....      | .....       | .....       | .....      | .....      | .....      | .....       | 800 |
| OR1984               | .....      | .....      | .....       | .....       | .....      | .....      | .....      | .....       | 800 |
| Benin_97/1           | .....      | .....      | .....       | .....       | .....      | .....      | .....      | .....       | 800 |
| 15998_2015           | .....      | .....      | .....       | .....       | .....      | .....      | .....      | .....       | 800 |
| Pig/SD/DY-I/2021     | .....      | .....      | .....       | .....       | .....      | .....      | .....      | .....       | 800 |
| Warmbaths            | .....      | .....      | .....       | .....       | .....      | .....      | .....      | .....       | 800 |
| Mkuzi_1979           | .....      | .....      | .....       | .....       | .....      | .....      | .....      | .....L      | 800 |
| Tengani_62           | .....      | .....      | .....       | .....       | .....      | .....      | .....      | .....L      | 800 |
| ASFV-G               | .....      | .....      | .....       | .....       | .....      | .....      | .....      | .....L      | 800 |
| Ulyanovsk_19/WB-5699 | .....      | .....      | .....       | .....       | .....      | .....      | .....      | .....L      | 800 |
| HuB20                | .....      | .....      | .....       | .....       | .....      | .....      | .....      | .....L      | 800 |
| Pretorisuskop/96/4   | .....      | .....      | .....       | .....       | .....      | .....      | .....      | .....       | 800 |
| Warthog              | .....      | .....      | .....       | .....       | .....      | .....      | .....      | .....       | 800 |
| K49                  | .....      | .....      | .....       | .....       | .....      | .....      | .....T     | .....L      | 800 |
| OmLF2                | .....      | .....      | .....       | .....       | .....      | .....      | .....      | .....L      | 800 |
| Malawi_Lil-20/1      | .....      | .....      | .....       | .....       | .....      | .....      | .....      | .....L      | 800 |
| Ken05/Tk1            | .....      | .....      | .....       | .....       | .....      | .....      | .....T     | .....       | 800 |
| Kenya_1950           | .....      | .....      | .....       | .....       | .....      | .....      | .....T     | .....       | 800 |
| Ken.riel             | .....      | .....      | .....       | .....       | .....      | .....      | .....T     | .....       | 800 |
| Uvira_B53            | .....      | .....      | .....       | .....       | .....      | .....      | .....T     | .....       | 800 |
| Ken06.Bus            | .....      | .....      | .....       | .....       | .....      | .....      | .....T     | .....       | 800 |
| N10                  | .....      | .....      | .....       | .....       | .....      | .....      | .....T     | .....       | 800 |
| Conservation         |            |            |             |             |            |            |            |             |     |
|                      | 820        | 840        | 860         | 880         |            |            |            |             |     |
| CP2475L_DR-1980      | ALSVGLKLN  | QSEIGGQVVA | LARTPEEAAQ  | RVYLSLTVRVN | DALSTRWETE | DVFFTFMLKS | MAAKIFIVLG | IYDMFERPEP  | 880 |
| LO2018_minor         | .....      | .....      | .....       | .....       | .....      | .....      | .....      | .....       | 880 |
| 31479_2015           | .....      | .....      | .....       | .....       | .....      | .....      | .....      | .....       | 880 |
| OR1984               | .....      | .....      | .....       | .....       | .....      | .....      | .....      | .....       | 880 |
| Benin_97/1           | .....      | .....      | .....       | .....       | .....      | .....      | .....      | .....       | 880 |
| 15998_2015           | .....      | .....      | .....       | .....       | .....      | .....      | .....      | .....       | 880 |
| Pig/SD/DY-I/2021     | .....      | .....      | .....       | .....       | .....      | .....      | .....      | .....       | 880 |
| Warmbaths            | .....      | .....      | .....       | .....       | .....      | .....      | .....      | .....       | 880 |
| Mkuzi_1979           | .....      | .....      | .....       | .....       | .....      | .....      | .....      | .....       | 880 |
| Tengani_62           | .....      | .....      | .....M      | .....       | .....      | .....      | .....      | .....       | 880 |
| ASFV-G               | .....      | .....      | .....M      | .....       | .....      | .....      | .....      | .....       | 880 |
| Ulyanovsk_19/WB-5699 | .....      | .....      | .....M      | .....       | .....      | .....      | .....      | .....       | 880 |
| HuB20                | .....      | .....      | .....M      | .....       | .....      | .....      | .....      | .....       | 880 |
| Pretorisuskop/96/4   | .....      | .....      | .....       | .....       | .....      | .....      | .....      | .....       | 880 |
| Warthog              | .....      | .....      | .....       | .....       | .....      | .....      | .....      | .....       | 880 |
| K49                  | .....      | .....      | .....M      | .....       | .....      | .....      | .....      | .....       | 880 |
| OmLF2                | .....      | .....      | .....       | .....       | .....      | .....      | .....      | .....       | 880 |
| Malawi_Lil-20/1      | .....      | .....      | .....M      | .....       | .....      | .....      | .....      | .....       | 880 |
| Ken05/Tk1            | .....      | .....      | .....TQ     | .....       | .....      | .....      | .....      | .....       | 880 |
| Kenya_1950           | .....      | .....      | .....TQ     | .....       | .....      | .....      | .....      | .....       | 880 |
| Ken.riel             | .....      | .....      | .....TQ     | .....       | .....      | .....      | .....      | .....       | 880 |
| Uvira_B53            | .....      | .....      | .....TQ     | .....       | .....      | .....      | .....      | .....       | 880 |
| Ken06.Bus            | .....      | .....      | .....TQ     | .....       | .....      | .....      | .....      | .....       | 880 |
| N10                  | .....      | .....      | .....TQ     | .....       | .....      | .....      | .....      | .....       | 880 |
| Conservation         |            |            |             |             |            |            |            |             |     |
|                      | 900        | 920        | 940         | 960         |            |            |            |             |     |
| CP2475L_DR-1980      | VYKLIPTMRI | LGGADELEPE | VIPEAAELYF  | RLPRLAEFYQ  | KLFSFRDENV | QISMLPELEG | IFSGLIRIIF | MRPIELINIG  | 960 |
| LO2018_minor         | .....      | .....      | .....       | .....       | .....      | .....      | .....      | .....       | 960 |
| 31479_2015           | .....      | .....      | .....       | .....       | .....      | .....      | .....      | .....       | 960 |
| OR1984               | .....      | .....      | .....       | .....       | .....      | .....      | .....      | .....       | 960 |
| Benin_97/1           | .....      | .....      | .....       | .....       | .....      | .....      | .....      | .....       | 960 |
| 15998_2015           | .....      | .....      | .....       | .....       | .....      | .....      | .....      | .....       | 960 |
| Pig/SD/DY-I/2021     | .....      | .....      | .....       | .....       | .....      | .....      | .....      | .....       | 960 |
| Warmbaths            | .....      | .....      | .....       | .....       | .....      | .....      | .....      | .....       | 960 |
| Mkuzi_1979           | .....      | .....      | .....       | .....       | .....      | .....      | .....      | .....       | 960 |
| Tengani_62           | .....      | .....      | .....       | .....       | .....      | .....      | .....      | .....       | 960 |
| ASFV-G               | .....      | .....      | .....       | .....       | .....      | .....      | .....      | .....       | 960 |
| Ulyanovsk_19/WB-5699 | .....      | .....      | .....       | .....       | .....      | .....      | .....      | .....       | 960 |
| HuB20                | .....      | .....      | .....       | .....       | .....      | .....      | .....      | .....       | 960 |
| Pretorisuskop/96/4   | .....      | .....      | .....       | .....       | .....      | .....      | .....      | .....       | 960 |
| Warthog              | .....      | .....      | .....       | .....       | .....      | .....      | .....      | .....       | 960 |
| K49                  | .....      | .....      | .....       | .....       | .....      | .....      | .....      | .....       | 960 |
| OmLF2                | .....      | .....      | .....       | .....       | .....      | .....      | .....      | .....       | 960 |
| Malawi_Lil-20/1      | .....      | .....      | .....       | .....       | .....      | .....      | .....      | .....G      | 960 |
| Ken05/Tk1            | .....      | .....      | .....       | .....       | .....      | .....      | .....      | .....V      | 960 |
| Kenya_1950           | .....      | .....      | .....       | .....       | .....      | .....      | .....      | .....V      | 960 |
| Ken.riel             | .....      | .....      | .....       | .....       | .....      | .....      | .....      | .....V      | 960 |
| Uvira_B53            | .....      | .....      | .....       | .....       | .....      | .....      | .....      | .....V      | 960 |
| Ken06.Bus            | .....      | .....      | .....       | .....       | .....      | .....      | .....      | .....V      | 960 |
| N10                  | .....      | .....      | .....       | .....       | .....      | .....      | .....      | .....V      | 960 |
| Conservation         |            |            |             |             |            |            |            |             |     |

# CP2475L Alignment

|                      | 980        | 1,000      | 1,020      | 1,040      |            |            |            |            |      |      |
|----------------------|------------|------------|------------|------------|------------|------------|------------|------------|------|------|
| CP2475L_DR-1980      | DYSETEIRQL | IKEINVIYQH | FNLEYGEQEA | TKKALIHFN  | EINRRFGVIT | RTEWEKFQRI | VQEARTMNDP | GMMNQTNYSI | 1040 |      |
| LO2018_minor         | .....      | .....      | .....      | .....      | .....      | .....      | .....      | .....      | 1040 |      |
| 31479_2015           | .....      | .....      | .....      | .....      | .....      | .....      | .....      | .....      | 1040 |      |
| OR1984               | .....      | .....      | .....      | .....      | .....      | .....      | .....      | .....      | 1040 |      |
| Benin_97/1           | .....      | .....      | .....      | .....      | .....      | .....      | .....      | .....      | 1040 |      |
| 15998_2015           | .....      | .....      | .....      | .....      | .....      | .....      | .....      | .....      | 1040 |      |
| Pig/SD/DY-I/2021     | .....      | .....      | .....      | .....      | .....      | .....      | .....      | .....      | 1040 |      |
| Warmbaths            | .....      | .....      | .....      | .....      | .....      | .....      | .....      | .....      | 1040 |      |
| Mkuzi_1979           | .....      | .....      | .....      | .....      | .....      | .....      | .....      | .....      | 1040 |      |
| Tengani_62           | .....      | .....      | .....      | .....      | .....      | .....      | .....      | .....      | 1040 |      |
| ASFV-G               | .....      | .....      | .....      | .....      | .....      | .....      | .....      | .....      | 1040 |      |
| Ulyanovsk_19/WB-5699 | .....      | .....      | .....      | .....      | .....      | .....      | .....      | .....      | 1040 |      |
| HuB20                | .....      | .....      | .....      | .....      | .....      | .....      | .....      | .....      | 1040 |      |
| Pretorisuskop/96/4   | .....      | .....      | .....      | .....      | .....      | .....      | .....      | .....      | 1040 |      |
| Warthog              | .....      | .....      | .....      | .....      | .....      | .....      | .....      | .....      | 1040 |      |
| K49                  | .....      | .....      | .....      | .....      | .....      | .....      | .....      | .....      | 1040 |      |
| OmLF2                | .....      | .....      | .....      | .....      | .....      | .....      | .....      | .....      | 1040 |      |
| Malawi_Lil-20/1      | .....      | .....      | .....      | .....      | .....      | .....      | .....      | .....      | 1040 |      |
| Ken05/Tk1            | .....      | .....      | .....      | V          | .....      | .....      | .....      | .....      | 1040 |      |
| Kenya_1950           | .....      | .....      | .....      | V          | .....      | .....      | .....      | .....      | 1040 |      |
| Ken.riel             | .....      | .....      | .....      | V          | .....      | .....      | .....      | .....      | 1040 |      |
| Uvira_B53            | .....      | .....      | .....      | V          | .....      | .....      | .....      | .....      | 1040 |      |
| Ken06.Bus            | .....      | .....      | .....      | V          | .....      | .....      | .....      | .....      | 1040 |      |
| N10                  | .....      | .....      | .....      | V          | .....      | .....      | .....      | .....      | 1040 |      |
| Conservation         |            |            |            |            |            |            |            |            |      |      |
|                      | 1,060      | 1,080      | 1,100      | 1,120      |            |            |            |            |      |      |
| CP2475L_DR-1980      | LPDEDGYTQS | SQLLPSDRFI | SPSTQPTPKW | RPALYNIDSV | DVQTGMLQPN | SQWDLVQKFR | KQLSEMFEDP | SLQQELGKVS | 1120 |      |
| LO2018_minor         | .....      | .....      | .....      | .....      | .....      | .....      | .....      | .....      | 1120 |      |
| 31479_2015           | .....      | .....      | .....      | .....      | .....      | .....      | .....      | .....      | 1120 |      |
| OR1984               | .....      | .....      | .....      | .....      | .....      | .....      | .....      | .....      | 1120 |      |
| Benin_97/1           | .....      | .....      | .....      | .....      | .....      | .....      | .....      | .....      | 1120 |      |
| 15998_2015           | .....      | .....      | .....      | .....      | .....      | .....      | .....      | .....      | 1120 |      |
| Pig/SD/DY-I/2021     | .....      | .....      | .....      | .....      | .....      | .....      | .....      | .....      | 1120 |      |
| Warmbaths            | .....      | .....      | S          | .....      | .....      | .....      | .....      | .....      | 1120 |      |
| Mkuzi_1979           | .....      | I          | .....      | S          | .....      | .....      | .....      | .....      | 1120 |      |
| Tengani_62           | .....      | .....      | .....      | .....      | .....      | .....      | .....      | I          | 1120 |      |
| ASFV-G               | .....      | .....      | .....      | .....      | .....      | .....      | .....      | I          | 1120 |      |
| Ulyanovsk_19/WB-5699 | .....      | .....      | .....      | .....      | .....      | .....      | .....      | I          | 1120 |      |
| HuB20                | .....      | .....      | .....      | .....      | .....      | .....      | .....      | I          | 1120 |      |
| Pretorisuskop/96/4   | .....      | .....      | S          | .....      | .....      | .....      | .....      | .....      | 1120 |      |
| Warthog              | .....      | .....      | S          | .....      | .....      | .....      | .....      | .....      | 1120 |      |
| K49                  | .....      | .....      | .....      | .....      | .....      | .....      | .....      | I          | 1120 |      |
| OmLF2                | .....      | I          | .....      | S          | .....      | .....      | .....      | .....      | 1120 |      |
| Malawi_Lil-20/1      | .....      | .....      | G          | S          | .....      | .....      | .....      | I          | 1120 |      |
| Ken05/Tk1            | .....      | .....      | G          | S          | .....      | .....      | .....      | .....      | 1120 |      |
| Kenya_1950           | .....      | .....      | G          | S          | .....      | .....      | .....      | .....      | 1120 |      |
| Ken.riel             | .....      | .....      | G          | S          | .....      | .....      | .....      | .....      | 1120 |      |
| Uvira_B53            | .....      | .....      | G          | S          | .....      | .....      | .....      | .....      | 1120 |      |
| Ken06.Bus            | .....      | .....      | G          | S          | .....      | .....      | .....      | .....      | 1120 |      |
| N10                  | .....      | .....      | G          | S          | .....      | .....      | .....      | .....      | 1120 |      |
| Conservation         |            |            |            |            |            |            |            |            |      |      |
|                      | 1,140      | 1,160      | 1,180      | 1,200      |            |            |            |            |      |      |
| CP2475L_DR-1980      | YQELIRQAIN | ELKKEHTDKI | QIVSKLIQGS | ESLADTDVNK | IFLPHETVIT | GLNLLSAIYV | LLNNFRNNIK | GLDLDTIQKS | 1200 |      |
| LO2018_minor         | .....      | .....      | .....      | .....      | .....      | .....      | .....      | .....      | 1200 |      |
| 31479_2015           | .....      | .....      | .....      | .....      | .....      | .....      | .....      | .....      | 1200 |      |
| OR1984               | .....      | .....      | .....      | .....      | .....      | .....      | .....      | .....      | 1200 |      |
| Benin_97/1           | .....      | .....      | .....      | .....      | .....      | .....      | .....      | .....      | 1200 |      |
| 15998_2015           | .....      | .....      | .....      | .....      | .....      | .....      | .....      | .....      | 1200 |      |
| Pig/SD/DY-I/2021     | .....      | .....      | .....      | .....      | .....      | .....      | .....      | .....      | 1200 |      |
| Warmbaths            | .....      | D          | .....      | .....      | .....      | .....      | .....      | .....      | 1200 |      |
| Mkuzi_1979           | .....      | D          | .....      | .....      | .....      | .....      | .....      | .....      | 1200 |      |
| Tengani_62           | .....      | .....      | .....      | .....      | .....      | .....      | .....      | .....      | 1200 |      |
| ASFV-G               | .....      | .....      | .....      | .....      | .....      | .....      | .....      | .....      | 1200 |      |
| Ulyanovsk_19/WB-5699 | .....      | .....      | .....      | .....      | .....      | .....      | .....      | .....      | 1200 |      |
| HuB20                | .....      | .....      | .....      | .....      | .....      | .....      | .....      | .....      | 1200 |      |
| Pretorisuskop/96/4   | .....      | D          | .....      | .....      | .....      | .....      | .....      | .....      | 1200 |      |
| Warthog              | .....      | D          | .....      | .....      | .....      | .....      | .....      | .....      | 1200 |      |
| K49                  | .....      | .....      | .....      | .....      | .....      | .....      | .....      | .....      | 1200 |      |
| OmLF2                | .....      | .....      | .....      | .....      | .....      | .....      | .....      | .....      | 1200 |      |
| Malawi_Lil-20/1      | .....      | .....      | .....      | .....      | .....      | .....      | .....      | .....      | 1200 |      |
| Ken05/Tk1            | .....      | Q          | T          | .....      | .....      | .....      | T          | A          | 1200 |      |
| Kenya_1950           | .....      | Q          | T          | .....      | .....      | .....      | T          | A          | 1200 |      |
| Ken.riel             | .....      | Q          | T          | .....      | .....      | .....      | T          | A          | 1200 |      |
| Uvira_B53            | .....      | Q          | T          | .....      | .....      | .....      | T          | A          | 1200 |      |
| Ken06.Bus            | .....      | Q          | T          | .....      | .....      | .....      | T          | A          | M    | 1200 |
| N10                  | .....      | Q          | T          | .....      | .....      | .....      | T          | A          | M    | 1200 |
| Conservation         |            |            |            |            |            |            |            |            |      |      |

# CP2475L Alignment

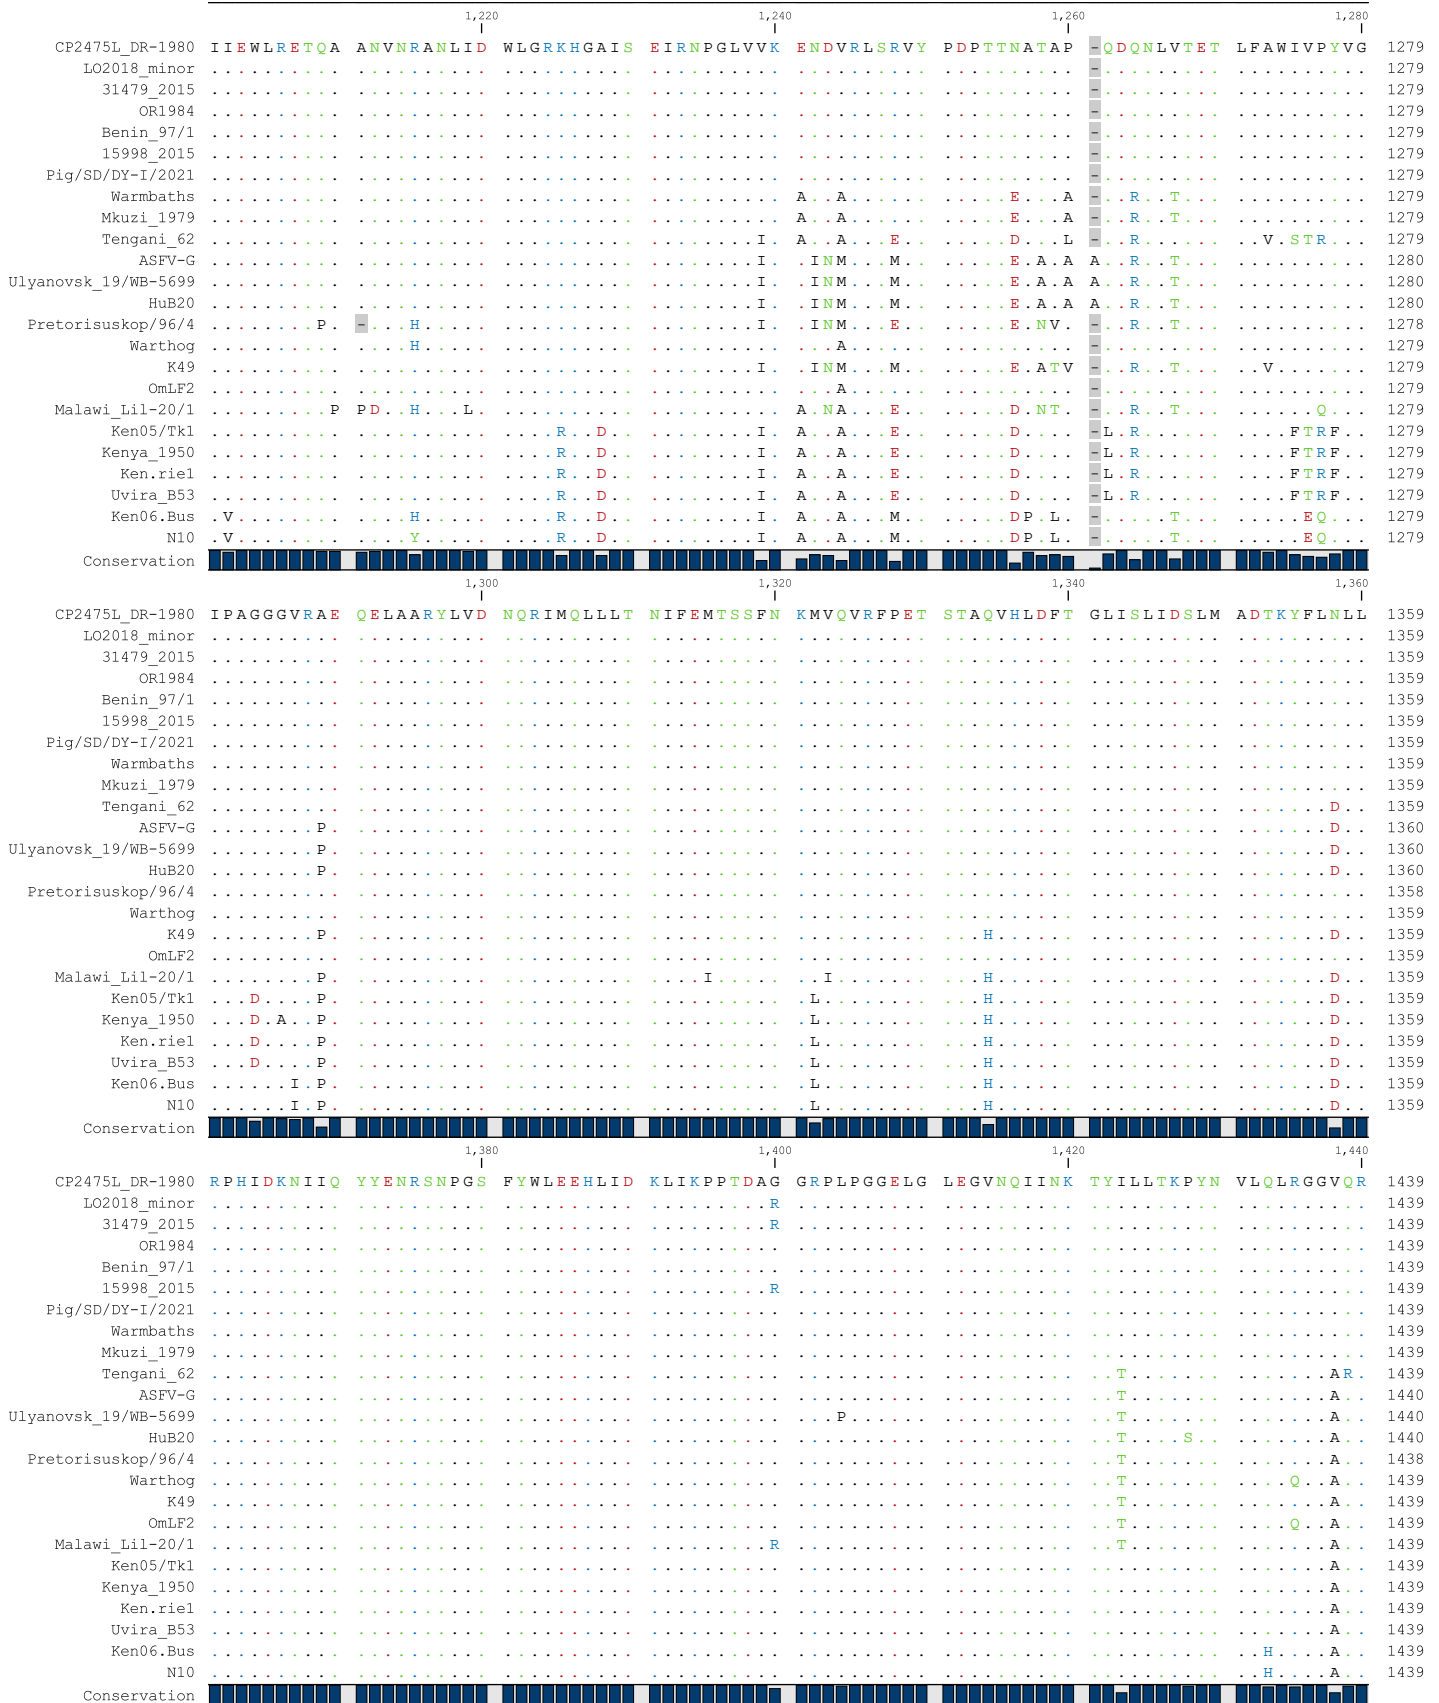

# CP2475L Alignment

|                      | 1,460      | 1,480      | 1,500      | 1,520      |             |            |            |            |             |            |      |
|----------------------|------------|------------|------------|------------|-------------|------------|------------|------------|-------------|------------|------|
| CP2475L_DR-1980      | RDAANIQINN | NPQPSERFEQ | YGRVFSRLVF | YDALENNSGL | RVEQVVLGDF  | RLSNLIRTTN | AQEENTLSYW | DNMAP--    | RTY         | 1517       |      |
| LO2018_minor         | .....      | .....      | .....      | .....      | .....       | .....      | .....      | --         | ..          | 1517       |      |
| 31479_2015           | .....      | .....      | .....      | .....      | .....       | .....      | .....      | --         | ..          | 1517       |      |
| OR1984               | .....      | .....      | .....      | .....      | .....       | .....      | .....      | --         | ..          | 1517       |      |
| Benin_97/1           | .....      | .....      | .....      | .....      | .....       | .....      | .....      | --         | ..          | 1517       |      |
| 15998_2015           | .....      | .....      | .....      | .....      | .....       | .....      | .....      | --         | ..          | 1517       |      |
| Pig/SD/DY-I/2021     | .....      | .....      | .....      | .....      | .....       | .....      | .....      | --         | ..          | 1517       |      |
| Warmbaths            | .....      | .....      | .....      | .....      | .....       | .....      | .....      | --         | ..          | 1517       |      |
| Mkuzi_1979           | .....      | .....      | .....      | .....      | .....       | .....      | .....      | --         | ..          | 1517       |      |
| Tengani_62           | G.....     | .....      | .....      | .....      | .....       | A.....     | .....      | --         | ..          | 1517       |      |
| ASFV-G               | .....      | S.....     | .....      | .....      | .....       | .....      | .....      | I..L..     | ..          | 1518       |      |
| Ulyanovsk_19/WB-5699 | .....      | S.....     | .....      | .....      | .....       | A.....     | .....      | I..L..     | ..          | 1518       |      |
| HuB20                | .....      | S.....     | .....      | .....      | .....       | A.....     | .....      | I..L..     | ..          | 1518       |      |
| Pretorisuskop/96/4   | .....      | .....      | .....      | .....      | .....       | .....      | A.....     | I..L..     | ..          | 1516       |      |
| Warthog              | .....      | .....      | .....      | .....      | .....       | .....      | A.....     | I..L..     | ..          | 1517       |      |
| K49                  | .....      | S.....     | .....      | .....      | .....       | A.....     | .....      | I..L..     | ..          | 1517       |      |
| OmLF2                | .....      | .....      | .....      | .....      | .....       | .....      | A.....     | I..L..     | ..          | 1517       |      |
| Malawi_Lil-20/1      | .....      | S.....     | .....      | K.....     | .....       | A.....     | .....      | I..L..     | ..          | 1517       |      |
| Ken05/Tk1            | GN.....    | EL..Y..    | .....      | IE.....    | .....       | A.....     | V.....     | A..F..     | TAV...A     | 1517       |      |
| Kenya_1950           | GN.....    | EF..Y..    | .....      | IE.....    | .....       | A.....     | .....      | A..F..     | TAV...A     | 1517       |      |
| Ken.riel             | GN.....    | EL..Y..    | .....      | IE.....    | .....       | A.....     | V.....     | A..F..     | TAV...A     | 1517       |      |
| Uvira_B53            | GN.....    | EH..Y..    | .....      | IE.....    | .....       | A.....     | V.....     | A..F..     | TAV...A     | 1517       |      |
| Ken06.Bus            | .....      | EL..Y..    | .....      | D.....     | .....       | A.....     | .....      | A..F..     | TAV...AP..A | 1519       |      |
| N10                  | .....      | EL..Y..    | .....      | D.....     | .....       | A.....     | .....      | A..F..     | TAV...AP..A | 1519       |      |
| Conservation         |            |            |            |            |             |            |            |            |             |            |      |
|                      | 1,540      | 1,560      | 1,580      | 1,600      |             |            |            |            |             |            |      |
| CP2475L_DR-1980      | ANVNDAAANL | RRYRLYGSDY | GIQNNRSM   | MM         | VFNQLVASYI  | ARFYDAPSGK | IYLNLI     | NAFAPA     | NGNFSQAVME  | LGYPHPDLAR | 1597 |
| LO2018_minor         | .....      | .....      | .....      | .....      | .....       | .....      | .....      | .....      | .....       | .....      | 1597 |
| 31479_2015           | .....      | .....      | .....      | .....      | .....       | .....      | .....      | .....      | .....       | .....      | 1597 |
| OR1984               | .....      | .....      | .....      | .....      | .....       | .....      | .....      | .....      | .....       | .....      | 1597 |
| Benin_97/1           | .....      | .....      | .....      | .....      | .....       | .....      | .....      | .....      | .....       | .....      | 1597 |
| 15998_2015           | .....      | .....      | .....      | .....      | .....       | .....      | .....      | .....      | .....       | .....      | 1597 |
| Pig/SD/DY-I/2021     | .....      | .....      | .....      | .....      | .....       | .....      | .....      | .....      | .....       | .....      | 1597 |
| Warmbaths            | .....      | .....      | .....      | .....      | .....       | .....      | .....      | .....      | .....       | .....      | 1597 |
| Mkuzi_1979           | .....      | .....      | .....      | .....      | .....       | .....      | .....      | .....      | .....       | .....      | 1597 |
| Tengani_62           | I.....     | .....      | R.....     | .....      | .....       | .....      | .....      | .....      | M..A.....   | .....      | 1597 |
| ASFV-G               | .....      | .....      | .....      | .....      | I.....      | T.....     | .....      | .....      | M..A.....   | .....      | 1598 |
| Ulyanovsk_19/WB-5699 | .....      | .....      | .....      | .....      | I.....      | T.....     | .....      | .....      | M..A.....   | .....      | 1598 |
| HuB20                | .....      | .....      | .....      | .....      | I.....      | T.....     | .....      | .....      | M..A.....   | .....      | 1598 |
| Pretorisuskop/96/4   | .....      | .....      | H.....     | .....      | .....       | .....      | .....      | .....      | M..A.....   | .....      | 1596 |
| Warthog              | .....      | .....      | H.....     | .....      | .....       | .....      | .....      | .....      | M..A.....   | .....      | 1597 |
| K49                  | .....      | .....      | R.....     | .....      | .....       | .....      | .....      | .....      | M..A.....   | .....      | 1597 |
| OmLF2                | .....      | .....      | Q.....     | .....      | .....       | .....      | .....      | .....      | M..A.....   | .....      | 1597 |
| Malawi_Lil-20/1      | .....      | .....      | .....      | .....      | I.....      | T.....     | .....      | .....      | M..A.....   | .....      | 1597 |
| Ken05/Tk1            | .....      | .....      | R.....     | .....      | .....       | .....      | .....      | .....      | A.....      | .....      | 1597 |
| Kenya_1950           | .....      | .....      | R.....     | .....      | .....       | .....      | T.....     | .....      | A.....      | .....      | 1597 |
| Ken.riel             | .....      | .....      | R.....     | .....      | .....       | .....      | .....      | .....      | A.....      | .....      | 1597 |
| Uvira_B53            | .....      | .....      | R.....     | .....      | .....       | .....      | T.....     | .....      | A.....      | .....      | 1597 |
| Ken06.Bus            | .....      | N.....     | R.....     | .....      | .....       | .....      | .....      | .....      | A.....      | .....      | 1599 |
| N10                  | .....      | N.....     | R.....     | .....      | .....       | .....      | .....      | .....      | A.....      | .....      | 1599 |
| Conservation         |            |            |            |            |             |            |            |            |             |            |      |
|                      | 1,620      | 1,640      | 1,660      | 1,680      |             |            |            |            |             |            |      |
| CP2475L_DR-1980      | DNIAFGHRGD | PTEQSVLLLS | LGLMLQRLIK | DTNRQGLSQH | LISTLITEIPI | YLKENYRANL | PLFNKMFNIL | ISQGELLKQF |             | 1677       |      |
| LO2018_minor         | .....      | .....      | .....      | .....      | .....       | .....      | .....      | .....      |             | 1677       |      |
| 31479_2015           | .....      | .....      | .....      | .....      | .....       | .....      | .....      | .....      |             | 1677       |      |
| OR1984               | .....      | .....      | .....      | .....      | .....       | .....      | .....      | .....      |             | 1677       |      |
| Benin_97/1           | .....      | .....      | .....      | .....      | .....       | .....      | .....      | .....      |             | 1677       |      |
| 15998_2015           | .....      | .....      | .....      | .....      | .....       | .....      | .....      | .....      |             | 1677       |      |
| Pig/SD/DY-I/2021     | .....      | .....      | .....      | .....      | .....       | .....      | .....      | .....      |             | 1677       |      |
| Warmbaths            | .....      | .....      | .....      | .....      | .....       | .....      | .....      | .....      |             | 1677       |      |
| Mkuzi_1979           | .....      | .....      | .....      | .....      | .....       | .....      | .....      | .....      |             | 1677       |      |
| Tengani_62           | N.....     | .....      | .....      | .....      | .....       | .....      | .....      | .....      |             | 1677       |      |
| ASFV-G               | N.NV.....  | .....      | I.....     | .....      | .....       | .....      | .....      | .....      |             | 1678       |      |
| Ulyanovsk_19/WB-5699 | N.NV.....  | .....      | I.....     | .....      | .....       | .....      | .....      | .....      |             | 1678       |      |
| HuB20                | N.NV.....  | .....      | I.....     | .....      | V.....      | .....      | .....      | .....      |             | 1678       |      |
| Pretorisuskop/96/4   | N.N.....   | .....      | I.....     | .....      | .....       | .....      | .....      | .....      |             | 1676       |      |
| Warthog              | N.N.....   | .....      | I.....     | .....      | .....       | .....      | .....      | .....      |             | 1677       |      |
| K49                  | .....      | .....      | .....      | .....      | .....       | .....      | .....      | .....      |             | 1677       |      |
| OmLF2                | N.N.....   | .....      | I.....     | .....      | .....       | .....      | .....      | .....      |             | 1677       |      |
| Malawi_Lil-20/1      | N.N.....   | .....      | I.....     | .....      | .....       | .....      | .....      | .....      |             | 1677       |      |
| Ken05/Tk1            | .....      | T.....     | .....      | .....      | .....       | .....      | .....      | .....      |             | 1677       |      |
| Kenya_1950           | .....      | T.....     | .....      | .....      | .....       | .....      | .....      | .....      |             | 1677       |      |
| Ken.riel             | .....      | T.....     | .....      | .....      | .....       | .....      | .....      | .....      |             | 1677       |      |
| Uvira_B53            | .....      | T.....     | .....      | .....      | .....       | .....      | .....      | .....      |             | 1677       |      |
| Ken06.Bus            | .....      | .....      | .....      | .....      | .....       | .....      | Y.....     | .....      |             | 1679       |      |
| N10                  | .....      | .....      | .....      | .....      | .....       | .....      | Y.....     | .....      |             | 1679       |      |
| Conservation         |            |            |            |            |             |            |            |            |             |            |      |

# CP2475L Alignment

|                      |                |             |              |                 |             |              |                   |              |       |      |
|----------------------|----------------|-------------|--------------|-----------------|-------------|--------------|-------------------|--------------|-------|------|
|                      |                | 1,700       |              | 1,720           |             | 1,740        |                   | 1,760        |       |      |
| CP2475L_DR-1980      | IQYTNVQLAR     | P NLMGLLGAN | NDSVIYYNNN   | INVPMTGLSV      | GQAALRGIGG  | VFRPNVTLMP   | LGDAQNNTSD        | VVRKRLVAVI   | 1757  |      |
| LO2018_minor         | .....          | .....       | .....        | .....           | .....       | .....        | .....             | .....        | 1757  |      |
| 31479_2015           | .....          | .....       | .....        | .....           | .....       | .....        | .....             | .....        | 1757  |      |
| OR1984               | .....          | .....       | .....        | .....           | .....       | .....        | .....             | .....        | 1757  |      |
| Benin_97/1           | .....          | .....       | .....        | .....           | .....       | .....        | .....             | .....        | 1757  |      |
| 15998_2015           | .....          | .....       | .....        | .....           | .....       | .....        | .....             | .....        | 1757  |      |
| Pig/SD/DY-I/2021     | .....          | .....       | .....        | .....           | .....       | .....        | .....             | .....        | 1757  |      |
| Warmbaths            | .....          | .....       | .....        | .....           | .....       | .....        | .....             | I.....       | 1757  |      |
| Mkuzi_1979           | .....          | .....       | .....        | .....           | .....M..... | .....        | .....             | I.....       | 1757  |      |
| Tengani_62           | .....          | .....       | .....        | .....T.....     | .....       | .....        | .....             | .....        | 1757  |      |
| ASFV-G               | .....          | TA.....     | .....        | .....A.....     | .....       | .....        | .....             | .....        | 1757  |      |
| Ulyanovsk_19/WB-5699 | .....          | TA.....     | .....        | .....A.....     | .....       | .....        | .....             | .....        | 1757  |      |
| Hub20                | .....          | TA.....     | .....        | .....A.....     | .....       | .....        | .....             | .....        | 1757  |      |
| Pretorisuskop/96/4   | .....          | TA.....     | .....        | .....M.....     | .....       | .....S.....  | .....             | I.....       | 1756  |      |
| Warthog              | .....          | .....       | .....I.....  | .....T.....     | .....       | .....        | .....             | I.....       | 1756  |      |
| K49                  | .....          | TA.....     | .....        | .....T.....     | .....       | .....        | .....             | I.....       | 1757  |      |
| OmLF2                | .....          | .....       | .....I.....  | .....T.....     | .....       | .....        | .....             | I.....       | 1756  |      |
| Malawi_Lil-20/1      | .....          | TA..R..     | .....        | .....I.....     | .....M..... | .....        | .....             | I.....       | 1756  |      |
| Ken05/Tk1            | .....K.....    | TA.....     | .....I.....  | .....N..T.....  | .....S..... | .....DI..... | .....N.....N..... | .....I.....  | 1756  |      |
| Kenya_1950           | .....K.....    | TA.....     | .....I.....  | .....N..T.....  | .....S..... | .....DI..... | .....N.....N..... | .....I.....  | 1756  |      |
| Ken.riel             | .....K.....    | TA.....     | .....I.....  | .....N..TI..... | .....S..... | .....DI..... | .....N.....N..... | .....I.....  | 1756  |      |
| Uvira_B53            | .....K.....    | TA.....     | .....I.....  | .....N..T.....  | .....S..... | .....DI..... | .....N.....N..... | .....I.....  | 1756  |      |
| Ken06.Bus            | .....K.....    | A.....      | .....AI..... | .....I.....     | .....S..... | .....DI..... | .....N.....N..... | .....I.....  | 1758  |      |
| N10                  | .....K.....    | A.....      | .....AI..... | .....I.....     | .....N..... | .....I.....  | .....S.....       | .....DI..... | 1758  |      |
| Conservation         |                |             |              |                 |             |              |                   |              |       |      |
|                      |                | 1,780       |              | 1,800           |             | 1,820        |                   | 1,840        |       |      |
| CP2475L_DR-1980      | DGIIRGSHTL     | ADSAMEVLHE  | LTDHPIYLET   | EEHFIQNYMS      | RYNKEPLMPF  | SLSLYLRLDL   | RIENNEVDYD        | LLYPNLES     | GS    | 1837 |
| LO2018_minor         | .....          | .....       | .....        | .....           | .....       | .....        | .....             | .....        | ..... | 1837 |
| 31479_2015           | .....          | .....       | .....        | .....           | .....       | .....        | .....             | .....        | ..... | 1837 |
| OR1984               | .....          | .....       | .....        | .....           | .....       | .....        | .....             | .....        | ..... | 1837 |
| Benin_97/1           | .....          | .....       | .....        | .....           | .....       | .....        | .....             | .....        | ..... | 1837 |
| 15998_2015           | .....          | .....       | .....        | .....           | .....       | .....        | .....             | .....        | ..... | 1837 |
| Pig/SD/DY-I/2021     | .....          | .....       | .....        | .....           | .....       | .....        | .....             | .....        | ..... | 1837 |
| Warmbaths            | .....          | .....       | .....        | .....           | .....       | .....        | .....             | .....        | ..... | 1837 |
| Mkuzi_1979           | .....          | .....       | .....        | .....           | .....       | .....        | .....             | .....        | ..... | 1837 |
| Tengani_62           | .....          | .....       | .....        | .....           | .....       | .....        | .....             | .....        | ..... | 1837 |
| ASFV-G               | .....          | .....       | .....        | .....           | .....       | .....        | .....H.....       | .....        | ..... | 1837 |
| Ulyanovsk_19/WB-5699 | .....          | .....       | .....        | .....           | .....       | .....        | .....H.....       | .....        | ..... | 1837 |
| Hub20                | .....          | .....       | .....        | .....           | .....       | .....        | .....H.....       | .....        | ..... | 1837 |
| Pretorisuskop/96/4   | .....          | .....       | .....        | .....           | .....       | .....        | .....             | .....        | ..... | 1836 |
| Warthog              | .....          | .....       | .....        | .....           | .....       | .....        | .....             | .....        | ..... | 1836 |
| K49                  | .....          | .....       | .....        | .....           | .....       | .....        | .....             | .....        | ..... | 1837 |
| OmLF2                | .....          | .....       | .....        | .....           | .....       | .....        | .....             | .....        | ..... | 1836 |
| Malawi_Lil-20/1      | .....          | .....       | .....        | .....           | .....       | .....        | .....             | .....        | ..... | 1836 |
| Ken05/Tk1            | .....N.....    | .....L..... | .....N.....  | .....F.....     | .....       | .....        | .....             | .....        | ..... | 1836 |
| Kenya_1950           | .....N.....    | .....L..... | .....N.....  | .....F.....     | .....       | .....        | .....             | .....        | ..... | 1836 |
| Ken.riel             | .....N.....    | .....L..... | .....N.....  | .....F.....     | .....       | .....        | .....             | .....        | ..... | 1836 |
| Uvira_B53            | .....N.....    | .....L..... | .....N.....  | .....F.....     | .....       | .....        | .....             | .....        | ..... | 1836 |
| Ken06.Bus            | .....N..V..... | .....L..... | .....N.....  | .....           | .....       | .....        | .....M.....       | .....        | ..... | 1838 |
| N10                  | .....N..V..... | .....L..... | .....N.....  | .....           | .....       | .....        | .....M.....       | .....        | ..... | 1838 |
| Conservation         |                |             |              |                 |             |              |                   |              |       |      |
|                      |                | 1,860       |              | 1,880           |             | 1,900        |                   | 1,920        |       |      |
| CP2475L_DR-1980      | PEFKLLYGTR     | KLLGNDPVQL  | SDMPGVQLIM   | KNYNETVVAH      | EQITPTRFEH  | FYTHAIQALR   | FIVNIRSFKT        | VMMYNENTFG   | 1917  |      |
| LO2018_minor         | .....          | .....       | .....        | .....           | .....       | .....        | .....             | .....        | 1917  |      |
| 31479_2015           | .....          | .....       | .....        | .....           | .....       | .....        | .....             | .....        | 1917  |      |
| OR1984               | .....          | .....       | .....        | .....           | .....       | .....        | .....             | .....        | 1917  |      |
| Benin_97/1           | .....          | .....       | .....        | .....           | .....       | .....        | .....             | .....        | 1917  |      |
| 15998_2015           | .....          | .....       | .....        | .....           | .....       | .....        | .....             | .....        | 1917  |      |
| Pig/SD/DY-I/2021     | .....          | .....       | .....        | .....           | .....R..... | .....        | .....             | .....        | 1917  |      |
| Warmbaths            | .....          | .....       | .....        | .....           | .....R..... | .....        | .....             | .....        | 1917  |      |
| Mkuzi_1979           | .....          | .....       | .....        | .....           | .....R..... | .....        | .....I.....       | .....        | 1917  |      |
| Tengani_62           | .....          | .....       | .....        | .....           | .....R..... | .....        | .....I.....       | .....        | 1917  |      |
| ASFV-G               | .....          | .....       | .....        | .....           | .....R..... | .....        | .....I.....       | .....        | 1917  |      |
| Ulyanovsk_19/WB-5699 | .....          | .....       | .....        | .....           | .....R..... | .....        | .....I.....       | .....        | 1917  |      |
| Hub20                | .....          | .....       | .....        | .....           | .....R..... | .....        | .....I.....       | .....        | 1917  |      |
| Pretorisuskop/96/4   | .....          | .....       | .....        | .....           | .....R..... | .....        | .....I.....       | .....        | 1916  |      |
| Warthog              | .....          | .....       | .....        | .....           | .....R..... | .....        | .....I.....       | .....        | 1916  |      |
| K49                  | .....          | .....       | .....D.....  | .....           | .....R..... | .....        | .....I.....       | .....        | 1917  |      |
| OmLF2                | .....          | .....       | .....        | .....           | .....R..... | .....        | .....I.....       | .....        | 1916  |      |
| Malawi_Lil-20/1      | .....          | .....       | .....        | .....           | .....R..... | .....        | .....I.....       | .....T.....  | 1916  |      |
| Ken05/Tk1            | .....          | .....I..... | .....        | .....           | .....R..... | .....        | .....I.....       | .....T.....  | 1916  |      |
| Kenya_1950           | .....          | .....I..... | .....        | .....           | .....R..... | .....        | .....I.....       | .....T.....  | 1916  |      |
| Ken.riel             | .....          | .....I..... | .....        | .....           | .....R..... | .....        | .....I.....       | .....T.....  | 1916  |      |
| Uvira_B53            | .....          | .....I..... | .....        | .....           | .....R..... | .....        | .....I.....       | .....T.....  | 1916  |      |
| Ken06.Bus            | .....          | .....I..... | .....        | .....           | .....R..... | .....        | .....I.....       | .....T.....  | 1918  |      |
| N10                  | .....          | .....I..... | .....        | .....           | .....R..... | .....        | .....I.....       | .....T.....  | 1918  |      |
| Conservation         |                |             |              |                 |             |              |                   |              |       |      |



# CP2475L Alignment

|                      | 1,940      | 1,960      | 1,980      | 2,000      |            |            |            |            |      |
|----------------------|------------|------------|------------|------------|------------|------------|------------|------------|------|
| CP2475L_DR-1980      | GVNLIENRD  | DKPIITAGIG | MNAVYSLRKT | LQDVISFVES | SYQEEQINHI | HKIVSPKGQT | RTLGSNRERE | RIFNLFDMNI | 1997 |
| LO2018_minor         |            |            |            |            |            |            |            |            | 1997 |
| 31479_2015           |            |            |            |            |            |            |            |            | 1997 |
| OR1984               |            |            |            |            |            |            |            |            | 1997 |
| Benin_97/1           |            |            |            |            |            |            |            |            | 1997 |
| 15998_2015           |            |            |            |            |            |            |            |            | 1997 |
| Pig/SD/DY-I/2021     |            |            |            |            |            |            |            |            | 1997 |
| Warmbaths            |            |            |            |            |            |            |            |            | 1997 |
| Mkuzi_1979           |            |            |            |            |            |            |            |            | 1997 |
| Tengani_62           |            |            |            |            |            |            |            |            | 1997 |
| ASFV-G               |            |            |            |            |            |            |            |            | 1997 |
| Ulyanovsk_19/WB-5699 |            |            |            |            |            |            |            |            | 1997 |
| HuB20                |            |            |            |            |            |            |            |            | 1997 |
| Pretorisuskop/96/4   |            |            |            |            |            |            |            |            | 1996 |
| Warthog              |            |            |            |            |            |            |            |            | 1996 |
| K49                  |            |            |            |            |            |            |            |            | 1997 |
| OmLF2                |            |            |            |            |            |            |            |            | 1996 |
| Malawi_Lil-20/1      |            | D.N        |            |            |            | N          |            |            | 1996 |
| Ken05/Tk1            |            | D          | E          |            |            | N          | RS         | S          | 1996 |
| Kenya_1950           |            | G.D        | E          |            |            | N          | RS         | S          | 1996 |
| Ken.riel             |            | G.D        | E          |            |            | N          | RS         | S          | 1996 |
| Uvira_B53            |            | G.D        | E          |            |            | N          | RS         | S          | 1996 |
| Ken06.Bus            |            | G.D        | E          |            |            | N          | S          | S          | 1998 |
| N10                  |            | G.D        | E          |            |            | N          | S          | S          | 1998 |
| Conservation         |            |            |            |            |            |            |            |            |      |
|                      | 2,020      | 2,040      | 2,060      | 2,080      |            |            |            |            |      |
| CP2475L_DR-1980      | IPINVNALMR | SIPLANIYNY | DYSFEEIACL | MYGISAQKVR | SLNTAAQPD  | IAEVLNIPNR | PPMNTREFML | KLLINPYVSV | 2077 |
| LO2018_minor         |            |            |            |            |            |            |            |            | 2077 |
| 31479_2015           |            |            |            |            |            |            |            |            | 2077 |
| OR1984               |            |            |            |            |            |            |            |            | 2077 |
| Benin_97/1           |            |            |            |            |            |            |            |            | 2077 |
| 15998_2015           |            |            |            |            |            |            |            |            | 2077 |
| Pig/SD/DY-I/2021     |            |            |            |            |            |            |            |            | 2077 |
| Warmbaths            |            |            |            |            |            |            |            |            | 2077 |
| Mkuzi_1979           |            |            |            |            |            |            |            |            | 2077 |
| Tengani_62           |            |            |            |            |            |            |            |            | 2077 |
| ASFV-G               |            |            |            |            | D.T        | V          | I          |            | 2077 |
| Ulyanovsk_19/WB-5699 |            |            |            |            | D.T        | V          | I          |            | 2077 |
| HuB20                |            |            |            |            | D.T        | V          | I          |            | 2077 |
| Pretorisuskop/96/4   |            |            |            |            | D.T        | V          | I          |            | 2076 |
| Warthog              |            |            |            |            | D.T        | V          | I          |            | 2076 |
| K49                  |            |            |            |            | D.T        | V          | I          |            | 2077 |
| OmLF2                |            |            |            |            | D.T        | V          | I          |            | 2076 |
| Malawi_Lil-20/1      |            |            |            |            | D          | V          | I          |            | 2076 |
| Ken05/Tk1            | M          |            |            |            | D          | V.Q        |            | T          | 2076 |
| Kenya_1950           | M          |            |            |            | D          | V.Q        |            | T          | 2076 |
| Ken.riel             | M          |            |            |            | D          | V.Q        |            | T          | 2076 |
| Uvira_B53            | M          |            |            |            | D          | V.Q        |            | T          | 2076 |
| Ken06.Bus            | M          |            |            |            | D.G        | V.V        |            | T          | 2078 |
| N10                  | M          |            |            |            | D.G        | V.V        |            | T          | 2078 |
| Conservation         |            |            |            |            |            |            |            |            |      |
|                      | 2,100      | 2,120      | 2,140      | 2,160      |            |            |            |            |      |
| CP2475L_DR-1980      | SITQYGNELM | SKGSAGYMSR | IFRGDNALNM | GRPKFLSDQI | FNKVLFGSLY | PTQFDYDEAG | PGLAAGIQRG | REQWGPPLSE | 2157 |
| LO2018_minor         |            |            |            |            |            |            |            |            | 2157 |
| 31479_2015           |            |            |            |            |            |            |            |            | 2157 |
| OR1984               |            |            |            |            |            |            |            |            | 2157 |
| Benin_97/1           |            |            |            |            |            |            |            |            | 2157 |
| 15998_2015           |            |            |            |            |            |            |            |            | 2157 |
| Pig/SD/DY-I/2021     |            |            |            |            |            |            |            |            | 2157 |
| Warmbaths            |            |            |            |            |            |            |            |            | 2157 |
| Mkuzi_1979           |            |            |            |            |            |            |            |            | 2157 |
| Tengani_62           |            |            |            |            |            |            |            |            | 2157 |
| ASFV-G               |            | L          | N          |            |            |            | S          | R.H.M.I    | 2157 |
| Ulyanovsk_19/WB-5699 |            | L          | N          |            |            |            | S          | R.H.M.I    | 2157 |
| HuB20                |            | L          | N          |            |            |            | S          | R.H.M.I    | 2157 |
| Pretorisuskop/96/4   |            | L          | N          |            |            |            | S          | R.H.M.I    | 2156 |
| Warthog              |            | L          | N          |            |            |            | S          | R.H.M.I    | 2156 |
| K49                  |            | L          | N          |            |            |            | S          | R.H.M.I    | 2157 |
| OmLF2                |            | L          | N          |            |            |            | S          | R.H.M.I    | 2156 |
| Malawi_Lil-20/1      |            | L          | N          |            |            |            | S          | R.H.M.I    | 2156 |
| Ken05/Tk1            |            | L          | FR.NT      |            |            |            |            | F.D        | 2156 |
| Kenya_1950           |            | L          | FR.N       |            |            |            |            | F.D        | 2156 |
| Ken.riel             |            | L          | FR.NT      |            |            |            |            | F.D        | 2156 |
| Uvira_B53            |            | L          | FR.NT      |            |            |            |            | F.D        | 2156 |
| Ken06.Bus            |            | S          | L          | R.N        |            |            |            | R.H.M.I    | 2158 |
| N10                  |            | S          | L          | R.N        |            |            |            | R.H.M.I    | 2158 |
| Conservation         |            |            |            |            |            |            |            |            |      |

# CP2475L Alignment

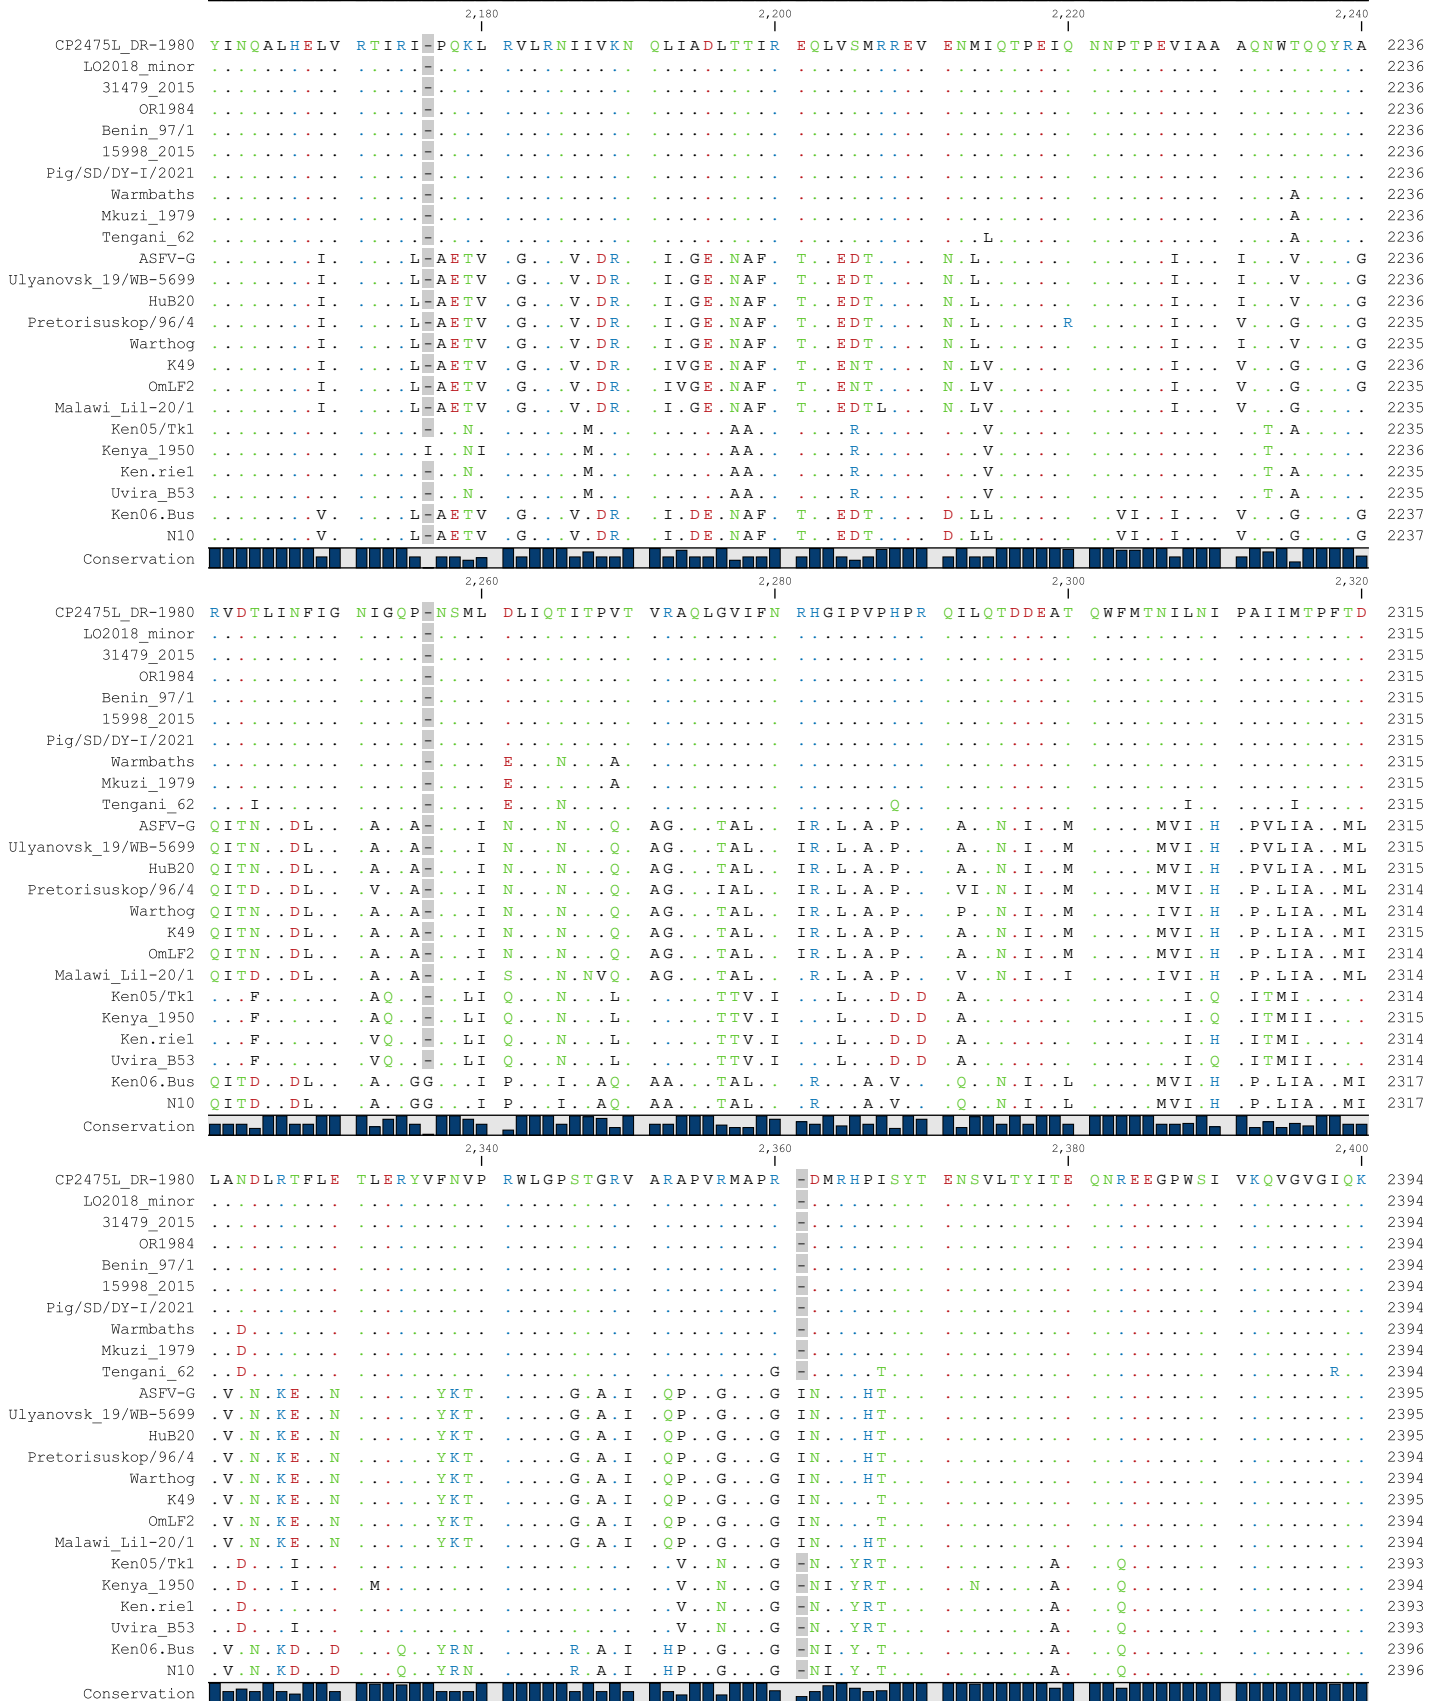

# CP2475L Alignment

|                      | 2,420 | 2,440 | 2,460 | 2,480 |   |   |   |   |   |   |   |   |   |   |   |   |   |   |   |   |   |   |   |   |   |   |   |   |   |   |   |   |   |   |   |   |   |   |   |   |   |   |   |   |   |   |   |   |   |   |   |   |   |   |   |   |   |   |   |   |      |   |   |   |   |   |   |   |   |   |      |   |   |   |   |   |   |   |   |   |      |
|----------------------|-------|-------|-------|-------|---|---|---|---|---|---|---|---|---|---|---|---|---|---|---|---|---|---|---|---|---|---|---|---|---|---|---|---|---|---|---|---|---|---|---|---|---|---|---|---|---|---|---|---|---|---|---|---|---|---|---|---|---|---|---|---|------|---|---|---|---|---|---|---|---|---|------|---|---|---|---|---|---|---|---|---|------|
| CP2475L_DR-1980      | P     | T     | L     | V     | Q | I | G | K | D | R | F | D | T | R | L | I | R | N | L | I | F | I | T | N | I | Q | R | L | L | R | L | R | L | N | L | E | L | S | Q | F | R | N | V | L | V | S | P | D | H | I | I | N | P | S | I | T | E | Y | G | F | S    | I | T | G | P | S | E | T | F | S | D    | K | Q | Y | D | S | D | I | R | I | 2474 |
| LO2018_minor         | .     | .     | .     | .     | . | . | . | . | . | . | . | . | . | . | . | . | . | . | . | . | . | . | . | . | . | . | . | . | . | . | . | . | . | . | . | . | . | . | . | . | . | . | . | . | . | . | . | . | . | . | . | . | . | . | . | . | . | . | . | . | .    | . | . | . | . | . | . | . | . | . | 2474 |   |   |   |   |   |   |   |   |   |      |
| 31479_2015           | .     | .     | .     | .     | . | . | . | . | . | . | . | . | . | . | . | . | . | . | . | . | . | . | . | . | . | . | . | . | . | . | . | . | . | . | . | . | . | . | . | . | . | . | . | . | . | . | . | . | . | . | . | . | . | . | . | . | . | . | . | . | 2474 |   |   |   |   |   |   |   |   |   |      |   |   |   |   |   |   |   |   |   |      |
| OR1984               | .     | .     | .     | .     | . | . | . | . | . | . | . | . | . | . | . | . | . | . | . | . | . | . | . | . | . | . | . | . | . | . | . | . | . | . | . | . | . | . | . | . | . | . | . | . | . | . | . | . | . | . | . | . | . | . | . | . | . | . | . | . | 2474 |   |   |   |   |   |   |   |   |   |      |   |   |   |   |   |   |   |   |   |      |
| Benin_97/1           | .     | .     | .     | .     | . | . | . | . | . | . | . | . | . | . | . | . | . | . | . | . | . | . | . | . | . | . | . | . | . | . | . | . | . | . | . | . | . | . | . | . | . | . | . | . | . | . | . | . | . | . | . | . | . | . | . | . | . | . | . | . | 2474 |   |   |   |   |   |   |   |   |   |      |   |   |   |   |   |   |   |   |   |      |
| 15998_2015           | .     | .     | .     | .     | . | . | . | . | . | . | . | . | . | . | . | . | . | . | . | . | . | . | . | . | . | . | . | . | . | . | . | . | . | . | . | . | . | . | . | . | . | . | . | . | . | . | . | . | . | . | . | . | . | . | . | . | . | . | . | . | 2474 |   |   |   |   |   |   |   |   |   |      |   |   |   |   |   |   |   |   |   |      |
| Pig/SD/DY-I/2021     | .     | .     | .     | .     | . | . | . | . | . | . | . | . | . | . | . | . | . | . | . | . | . | . | . | . | . | . | . | . | . | . | . | . | . | . | . | . | . | . | . | . | . | . | . | . | . | . | . | . | . | . | . | . | . | . | . | . | . | . | . | . | 2474 |   |   |   |   |   |   |   |   |   |      |   |   |   |   |   |   |   |   |   |      |
| Warmbaths            | .     | .     | .     | .     | . | . | . | . | . | . | . | . | . | . | . | . | . | . | . | . | . | . | . | . | . | . | . | . | . | . | . | . | . | . | . | . | . | . | . | . | . | . | . | . | . | . | . | . | . | . | . | . | . | . | . | . | . | . | . | . | 2474 |   |   |   |   |   |   |   |   |   |      |   |   |   |   |   |   |   |   |   |      |
| Mkuzi_1979           | .     | .     | .     | .     | . | . | . | . | . | . | . | . | . | . | . | . | . | . | . | . | . | . | . | . | . | . | . | . | . | . | . | . | . | . | . | . | . | . | . | . | . | . | . | . | . | . | . | . | . | . | . | . | . | . | . | . | . | . | . | . | 2474 |   |   |   |   |   |   |   |   |   |      |   |   |   |   |   |   |   |   |   |      |
| Tengani_62           | .     | .     | .     | .     | . | . | . | . | . | . | . | . | . | . | . | . | . | . | . | . | . | . | . | . | . | . | . | . | . | . | . | . | . | . | . | . | . | . | . | . | . | . | . | . | . | . | . | . | . | . | . | . | . | . | . | . | . | . | . | . | 2474 |   |   |   |   |   |   |   |   |   |      |   |   |   |   |   |   |   |   |   |      |
| ASFV-G               | .     | .     | .     | .     | . | . | . | . | . | . | . | . | . | . | . | . | . | . | . | . | . | . | . | . | . | . | . | . | . | . | . | . | . | . | . | . | . | . | . | . | . | . | . | . | . | . | . | . | . | . | . | . | . | . | . | . | . | . | . | . | 2475 |   |   |   |   |   |   |   |   |   |      |   |   |   |   |   |   |   |   |   |      |
| Ulyanovsk_19/WB-5699 | .     | .     | .     | .     | . | . | . | . | . | . | . | . | . | . | . | . | . | . | . | . | . | . | . | . | . | . | . | . | . | . | . | . | . | . | . | . | . | . | . | . | . | . | . | . | . | . | . | . | . | . | . | . | . | . | . | . | . | . | . | . | 2475 |   |   |   |   |   |   |   |   |   |      |   |   |   |   |   |   |   |   |   |      |
| HuB20                | .     | .     | .     | .     | . | . | . | . | . | . | . | . | . | . | . | . | . | . | . | . | . | . | . | . | . | . | . | . | . | . | . | . | . | . | . | . | . | . | . | . | . | . | . | . | . | . | . | . | . | . | . | . | . | . | . | . | . | . | . | . | 2475 |   |   |   |   |   |   |   |   |   |      |   |   |   |   |   |   |   |   |   |      |
| Pretorisuskop/96/4   | .     | .     | .     | .     | . | . | . | . | . | . | . | . | . | . | . | . | . | . | . | . | . | . | . | . | . | . | . | . | . | . | . | . | . | . | . | . | . | . | . | . | . | . | . | . | . | . | . | . | . | . | . | . | . | . | . | . | . | . | . | . | 2474 |   |   |   |   |   |   |   |   |   |      |   |   |   |   |   |   |   |   |   |      |
| Warthog              | .     | .     | .     | .     | . | . | . | . | . | . | . | . | . | . | . | . | . | . | . | . | . | . | . | . | . | . | . | . | . | . | . | . | . | . | . | . | . | . | . | . | . | . | . | . | . | . | . | . | . | . | . | . | . | . | . | . | . | . | . | . | 2474 |   |   |   |   |   |   |   |   |   |      |   |   |   |   |   |   |   |   |   |      |
| K49                  | .     | .     | .     | .     | . | . | . | . | . | . | . | . | . | . | . | . | . | . | . | . | . | . | . | . | . | . | . | . | . | . | . | . | . | . | . | . | . | . | . | . | . | . | . | . | . | . | . | . | . | . | . | . | . | . | . | . | . | . | . | . | 2475 |   |   |   |   |   |   |   |   |   |      |   |   |   |   |   |   |   |   |   |      |
| OmLF2                | .     | .     | .     | .     | . | . | . | . | . | . | . | . | . | . | . | . | . | . | . | . | . | . | . | . | . | . | . | . | . | . | . | . | . | . | . | . | . | . | . | . | . | . | . | . | . | . | . | . | . | . | . | . | . | . | . | . | . | . | . | . | 2474 |   |   |   |   |   |   |   |   |   |      |   |   |   |   |   |   |   |   |   |      |
| Malawi_Lil-20/1      | .     | .     | .     | .     | . | . | . | . | . | . | . | . | . | . | . | . | . | . | . | . | . | . | . | . | . | . | . | . | . | . | . | . | . | . | . | . | . | . | . | . | . | . | . | . | . | . | . | . | . | . | . | . | . | . | . | . | . | . | . | . | 2474 |   |   |   |   |   |   |   |   |   |      |   |   |   |   |   |   |   |   |   |      |
| Ken05/Tk1            | .     | .     | .     | .     | . | . | . | . | . | . | . | . | . | . | . | . | . | . | . | . | . | . | . | . | . | . | . | . | . | . | . | . | . | . | . | . | . | . | . | . | . | . | . | . | . | . | . | . | . | . | . | . | . | . | . | . | . | . | . | . | 2473 |   |   |   |   |   |   |   |   |   |      |   |   |   |   |   |   |   |   |   |      |
| Kenya_1950           | .     | .     | .     | .     | . | . | . | . | . | . | . | . | . | . | . | . | . | . | . | . | . | . | . | . | . | . | . | . | . | . | . | . | . | . | . | . | . | . | . | . | . | . | . | . | . | . | . | . | . | . | . | . | . | . | . | . | . | . | . | . | 2474 |   |   |   |   |   |   |   |   |   |      |   |   |   |   |   |   |   |   |   |      |
| Ken.riel             | .     | .     | .     | .     | . | . | . | . | . | . | . | . | . | . | . | . | . | . | . | . | . | . | . | . | . | . | . | . | . | . | . | . | . | . | . | . | . | . | . | . | . | . | . | . | . | . | . | . | . | . | . | . | . | . | . | . | . | . | . | . | 2473 |   |   |   |   |   |   |   |   |   |      |   |   |   |   |   |   |   |   |   |      |
| Uvira_B53            | .     | .     | .     | .     | . | . | . | . | . | . | . | . | . | . | . | . | . | . | . | . | . | . | . | . | . | . | . | . | . | . | . | . | . | . | . | . | . | . | . | . | . | . | . | . | . | . | . | . | . | . | . | . | . | . | . | . | . | . | . | . | 2473 |   |   |   |   |   |   |   |   |   |      |   |   |   |   |   |   |   |   |   |      |
| Ken06.Bus            | .     | .     | .     | .     | . | . | . | . | . | . | . | . | . | . | . | . | . | . | . | . | . | . | . | . | . | . | . | . | . | . | . | . | . | . | . | . | . | . | . | . | . | . | . | . | . | . | . | . | . | . | . | . | . | . | . | . | . | . | . | . | 2476 |   |   |   |   |   |   |   |   |   |      |   |   |   |   |   |   |   |   |   |      |
| N10                  | .     | .     | .     | .     | . | . | . | . | . | . | . | . | . | . | . | . | . | . | . | . | . | . | . | . | . | . | . | . | . | . | . | . | . | . | . | . | . | . | . | . | . | . | . | . | . | . | . | . | . | . | . | . | . | . | . | . | . | . | . | . | 2476 |   |   |   |   |   |   |   |   |   |      |   |   |   |   |   |   |   |   |   |      |
| Conservation         |       |       |       |       |   |   |   |   |   |   |   |   |   |   |   |   |   |   |   |   |   |   |   |   |   |   |   |   |   |   |   |   |   |   |   |   |   |   |   |   |   |   |   |   |   |   |   |   |   |   |   |   |   |   |   |   |   |   |   |   |      |   |   |   |   |   |   |   |   |   |      |   |   |   |   |   |   |   |   |   |      |

|                      |   |      |
|----------------------|---|------|
| CP2475L_DR-1980      | L | 2475 |
| LO2018_minor         | . | 2475 |
| 31479_2015           | . | 2475 |
| OR1984               | . | 2475 |
| Benin_97/1           | . | 2475 |
| 15998_2015           | . | 2475 |
| Pig/SD/DY-I/2021     | . | 2475 |
| Warmbaths            | . | 2475 |
| Mkuzi_1979           | . | 2475 |
| Tengani_62           | . | 2475 |
| ASFV-G               | . | 2476 |
| Ulyanovsk_19/WB-5699 | . | 2476 |
| HuB20                | . | 2476 |
| Pretorisuskop/96/4   | . | 2475 |
| Warthog              | . | 2475 |
| K49                  | . | 2476 |
| OmLF2                | . | 2475 |
| Malawi_Lil-20/1      | . | 2475 |
| Ken05/Tk1            | . | 2474 |
| Kenya_1950           | . | 2475 |
| Ken.riel             | . | 2474 |
| Uvira_B53            | . | 2474 |
| Ken06.Bus            | . | 2477 |
| N10                  | . | 2477 |
| Conservation         | █ |      |

# G1211R Alignment

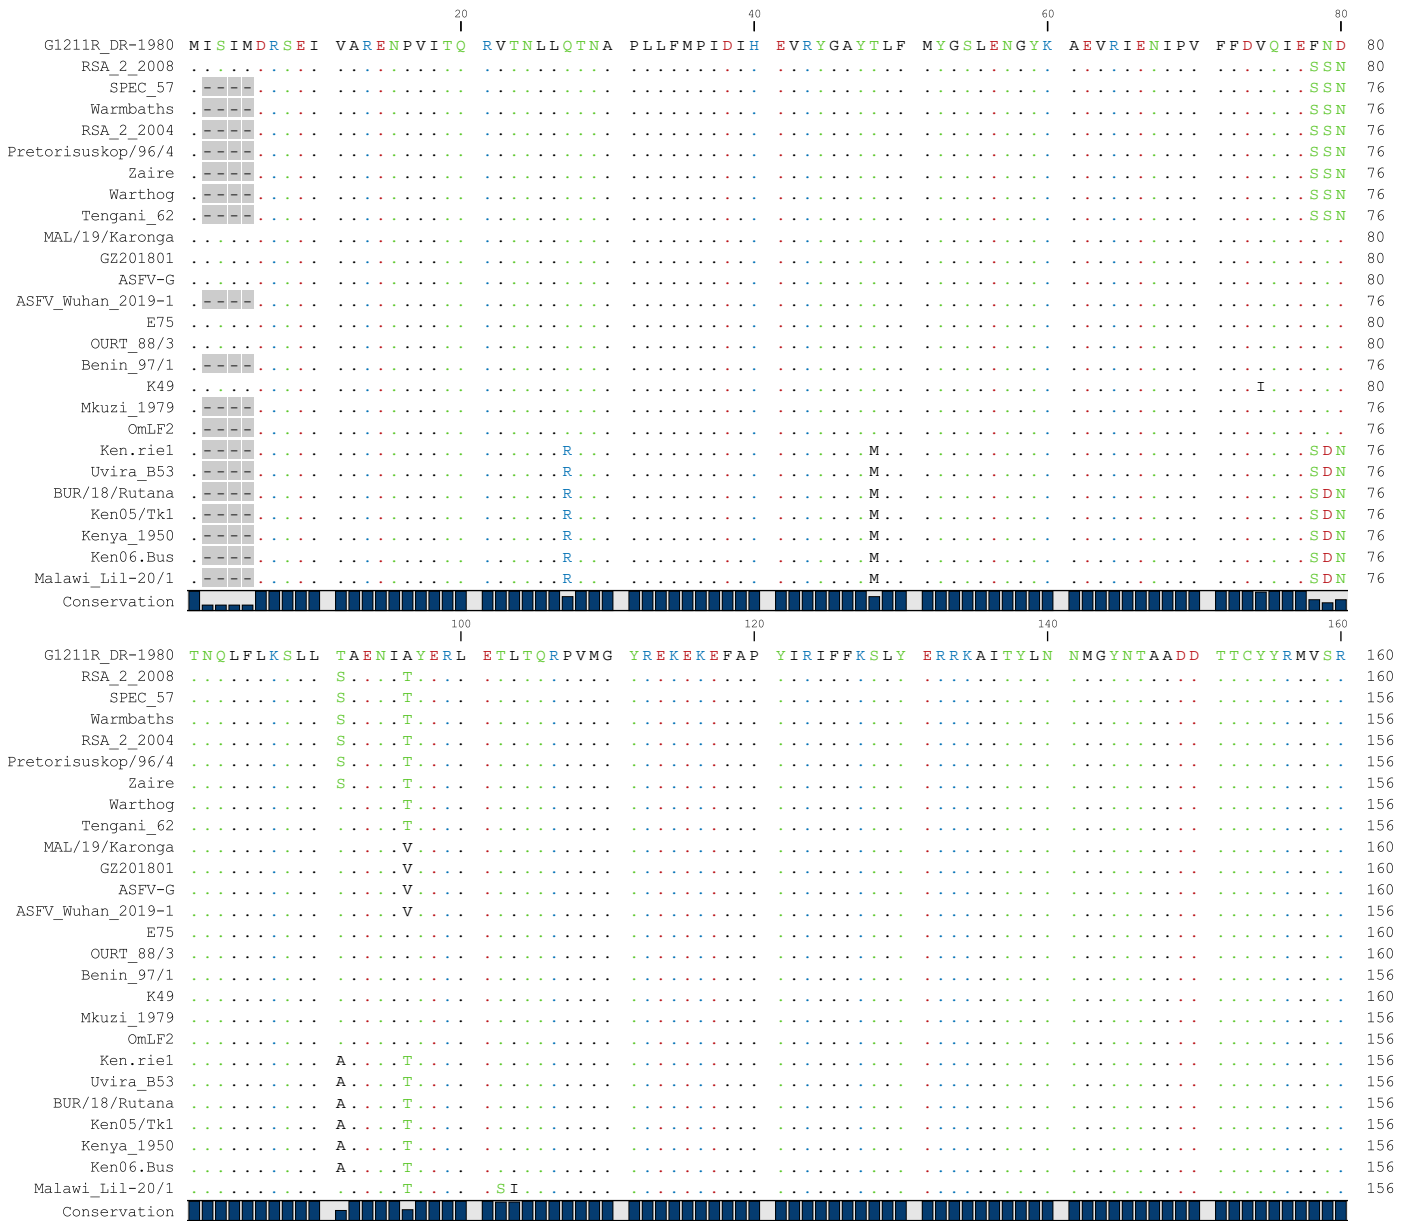

# G1211R Alignment

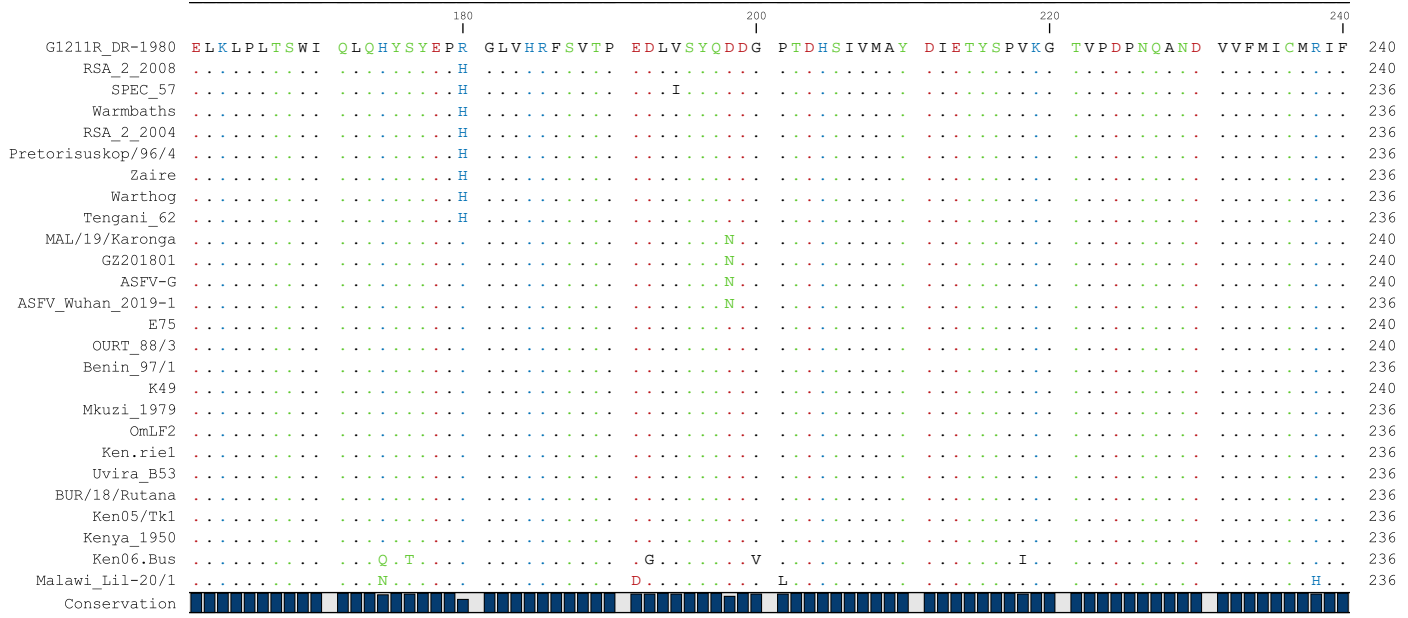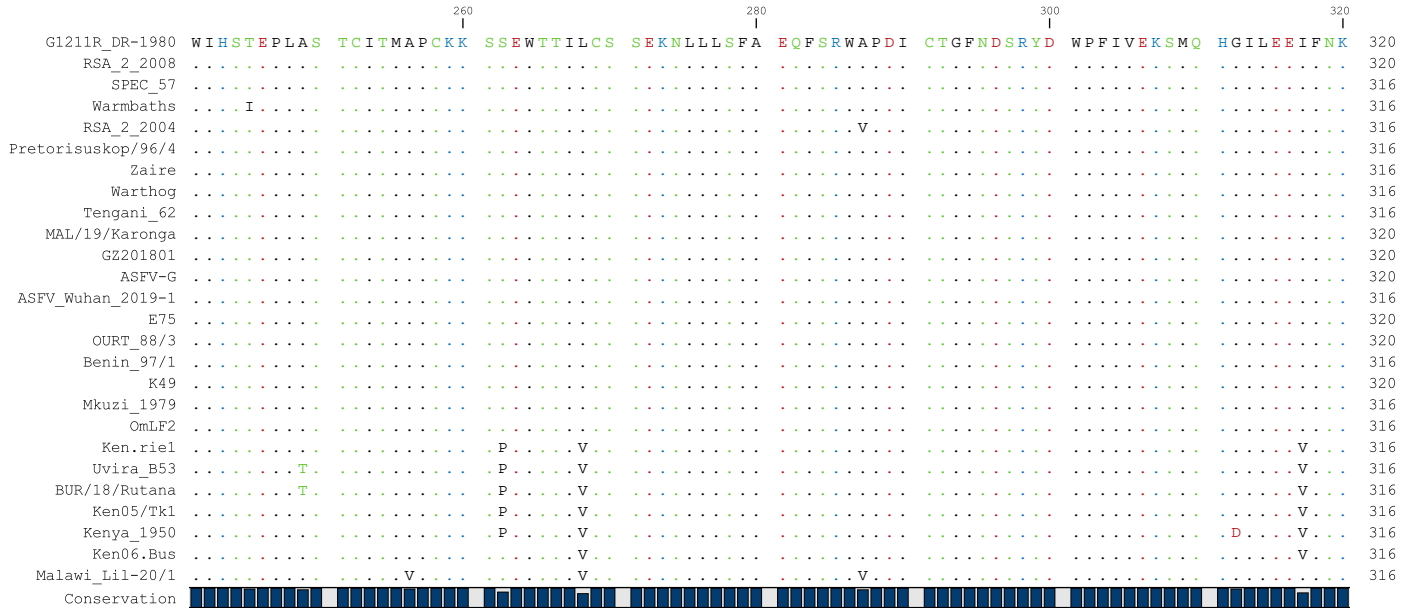

# G1211R Alignment

|                    | 340        | 360        | 380         | 400                 |            |            |            |             |     |
|--------------------|------------|------------|-------------|---------------------|------------|------------|------------|-------------|-----|
| G1211R_DR-1980     | MSLFWHQKLD | TILKCYVKE  | KRVKISA EKS | I I S S F L H T P G | CLPIDVRNMC | MQLYPKAEKT | SLKAFLENCG | LDSKVDLPYH  | 400 |
| RSA_2_2008         | .....      | .....      | .....       | .....               | .....      | .....      | .....      | .....       | 400 |
| SPEC_57            | .....      | .....      | .....       | .....               | .....      | .....      | .....      | .....       | 396 |
| Warmbaths          | .....      | .....      | .....       | .....               | .....      | .....      | .....      | .....       | 396 |
| RSA_2_2004         | .....      | .....      | .....       | .....               | .....      | .....      | .....      | .....       | 396 |
| Pretorisuskop/96/4 | .....      | .....      | .....       | .....               | .....      | .....      | .....      | .....       | 396 |
| Zaire              | .....      | .....      | .....       | .....               | .....      | .....      | .....      | .....       | 396 |
| Warthog            | .....      | .....      | .....       | .....               | .....      | .....      | .....      | .....       | 396 |
| Tengani_62         | .....      | .....      | .....       | .....               | .....      | .....      | .....      | .....       | 396 |
| MAL/19/Karonga     | .....      | .....      | .....       | .....               | .....      | .....      | .....      | .....       | 400 |
| GZ201801           | .....      | .....      | .....       | .....               | .....      | .....      | .....      | .....       | 400 |
| ASFV-G             | .....      | .....      | .....       | .....               | .....      | .....      | .....      | .....       | 400 |
| ASFV_Wuhan_2019-1  | .....      | .....      | .....       | .....               | .....      | .....      | .....      | .....       | 396 |
| E75                | .....      | .....      | .....       | .....               | .....      | .....      | .....      | .....       | 400 |
| OURT_88/3          | .....      | .....      | .....       | .....               | .....      | .....      | .....      | .....       | 400 |
| Benin_97/1         | .....      | .....      | .....       | .....               | .....      | .....      | .....      | .....       | 396 |
| K49                | .....      | .....      | .....       | .....               | .....      | .....      | .....      | .....       | 400 |
| Mkuzi_1979         | .....      | .....      | .....       | .....               | .....      | .....      | .....      | .....       | 396 |
| OmLF2              | .....      | .....      | .....       | .....               | .....      | .....      | .....      | .....       | 396 |
| Ken.riel           | .....P     | .....      | .....       | .....               | .....      | .....      | .....      | .....       | 396 |
| Uvira_B53          | .....P     | .....      | .....       | .....               | .....      | .....      | .....S     | .....       | 396 |
| BUR/18/Rutana      | .....P     | .....      | .....       | .....               | .....      | .....      | .....S     | .....       | 396 |
| Ken05/Tk1          | .....P     | .....      | .....       | .....               | .....      | .....      | .....      | .....       | 396 |
| Kenya_1950         | .....P     | .....      | .....       | .....               | .....M     | .....      | .....      | .....       | 396 |
| Ken06.Bus          | .....P     | .....      | .....       | .....               | .....      | .....      | .....      | .....I      | 396 |
| Malawi_Lil-20/1    | .....N     | .....      | .....       | .....               | .....M     | .....      | .....      | .....I      | 396 |
| Conservation       |            |            |             |                     |            |            |            |             |     |
|                    | 420        | 440        | 460         | 480                 |            |            |            |             |     |
| G1211R_DR-1980     | LMWKYYETRD | SEKMADVAYY | CIIDAQRQCD  | LLVRHNVIPD          | RREVGILSYT | SLYDCIYYAG | GHKVCNMLIA | YAIHDEYGR I | 480 |
| RSA_2_2008         | .....      | .....      | .....       | .....               | .....      | .....      | .....      | .....       | 480 |
| SPEC_57            | .....      | .....      | .....       | .....               | .....      | .....      | .....      | .....       | 476 |
| Warmbaths          | .....      | .....      | .....       | .....               | .....      | .....      | .....      | .....       | 476 |
| RSA_2_2004         | .....      | .....      | .....       | .....               | .....      | .....      | .....      | .....       | 476 |
| Pretorisuskop/96/4 | .....      | .....      | .....       | .....               | .....      | .....      | .....      | .....       | 476 |
| Zaire              | .....      | .....      | .....       | .....               | .....      | .....      | .....      | .....       | 476 |
| Warthog            | .....      | .....      | .....       | .....               | .....      | .....      | .....      | .....       | 476 |
| Tengani_62         | .....N     | .....      | .....       | .....               | .....      | .....      | .....      | .....       | 476 |
| MAL/19/Karonga     | .....      | .....      | .....       | .....               | .....      | .....      | .....      | .....       | 480 |
| GZ201801           | .....      | .....      | .....       | .....               | .....      | .....      | .....      | .....       | 480 |
| ASFV-G             | .....      | .....      | .....       | .....               | .....      | .....      | .....      | .....       | 480 |
| ASFV_Wuhan_2019-1  | .....      | .....      | .....       | .....               | .....      | .....      | .....      | .....       | 476 |
| E75                | .....      | .....      | .....       | .....               | .....      | .....      | .....      | .....       | 480 |
| OURT_88/3          | .....      | .....      | .....       | .....               | .....      | .....      | .....      | .....       | 480 |
| Benin_97/1         | .....      | .....      | .....       | .....               | .....      | .....      | .....      | .....       | 476 |
| K49                | .....      | .....      | .....       | .....               | .....      | .....      | .....      | .....       | 480 |
| Mkuzi_1979         | .....      | .....      | .....       | .....               | .....      | .....      | .....      | .....       | 476 |
| OmLF2              | .....      | .....      | .....       | .....               | .....      | .....      | .....      | .....       | 476 |
| Ken.riel           | .....      | .....      | .....       | .....               | .....      | .....      | .....      | .....       | 476 |
| Uvira_B53          | .....      | .....      | .....       | .....               | .....      | .....      | .....      | .....       | 476 |
| BUR/18/Rutana      | .....      | .....      | .....       | .....               | .....      | .....      | .....      | .....       | 476 |
| Ken05/Tk1          | .....      | .....      | .....       | .....               | .....      | .....      | .....      | .....       | 476 |
| Kenya_1950         | .....      | .....      | .....       | .....               | .....      | .....      | .....      | .....       | 476 |
| Ken06.Bus          | .....      | .....      | .....       | .....               | .....      | .....      | .....      | .....A      | 476 |
| Malawi_Lil-20/1    | .....      | .....      | .....       | .....               | .....      | .....      | .....      | .....       | 476 |
| Conservation       |            |            |             |                     |            |            |            |             |     |

# G1211R Alignment

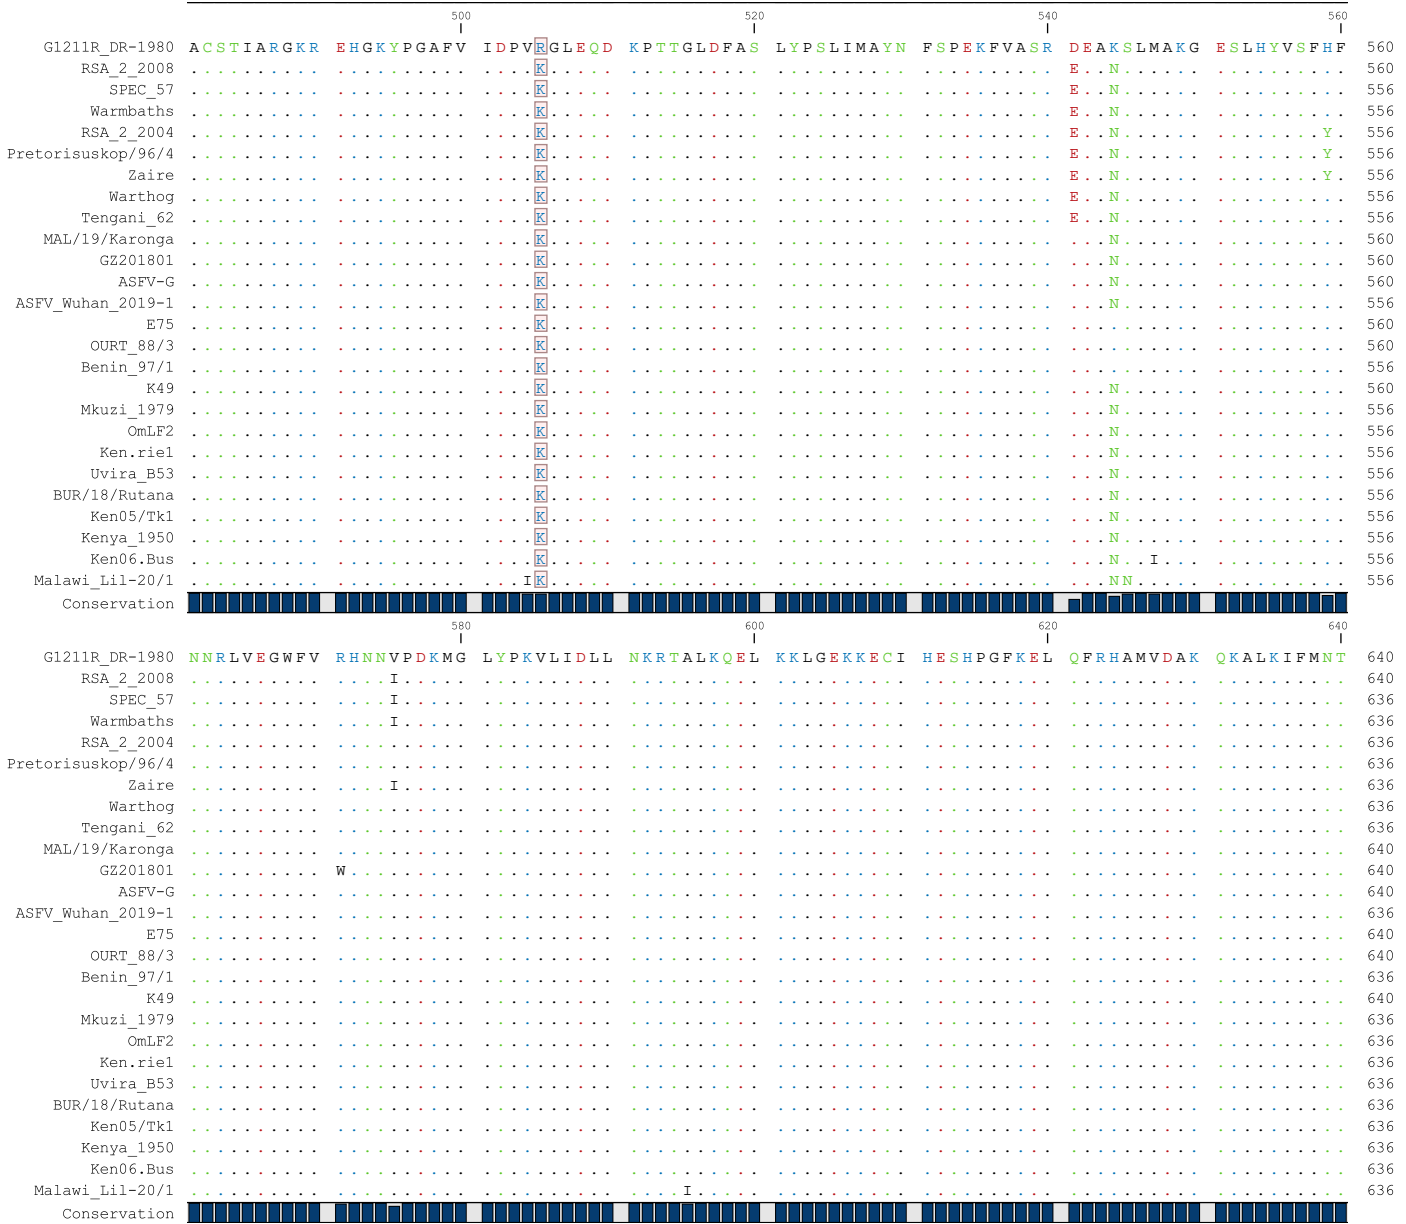

# G1211R Alignment

|                    | 660          | 680        | 700         | 720        |                 |                     |                     |                     |     |
|--------------------|--------------|------------|-------------|------------|-----------------|---------------------|---------------------|---------------------|-----|
| G1211R_DR-1980     | FYGEAGNNLS   | PFFLLPLAGG | VTSSGQYNLK  | LVYNFVINKG | YGIKYGD TDS     | LYITCPDSL Y         | TEVTDAYLNS          | QTIKHYEQL           | 720 |
| RSA_2_2008         | .....        | .....      | .....       | .....      | .....           | .....               | .....               | .....               | 720 |
| SPEC_57            | .....        | .....      | .....       | .....      | .....           | .....               | .....               | .....               | 716 |
| Warmbaths          | .....        | .....      | .....       | .....      | .....           | .....               | .....               | .....               | 716 |
| RSA_2_2004         | .....        | .....      | .....       | .....      | .....           | .....               | .....               | .....               | 716 |
| Pretorisuskop/96/4 | .....        | .....      | .....       | .....      | .....           | .....               | .....               | .....               | 716 |
| Zaire              | .....        | .....      | .....       | .....      | .....           | G.....              | .....               | .....               | 716 |
| Warthog            | .....        | .....      | .....       | .....      | .....           | .....               | .....               | .....               | 716 |
| Tengani_62         | .....        | .....      | .....       | .....      | .....           | .....               | .....               | .....               | 716 |
| MAL/19/Karonga     | .....        | .....      | .....       | .....      | .....           | .....               | .....               | .....               | 720 |
| GZ201801           | .....        | .....      | .....       | .....      | .....           | .....               | .....               | .....               | 720 |
| ASFV-G             | .....        | .....      | .....       | .....      | .....           | .....               | .....               | .....               | 720 |
| ASFV_Wuhan_2019-1  | .....        | .....      | .....       | .....      | .....           | .....               | .....               | .....               | 716 |
| E75                | .....        | .....      | .....       | .....      | .....           | .....               | .....               | .....               | 720 |
| OURT_88/3          | .....        | .....      | .....       | .....      | .....           | .....               | .....               | .....               | 720 |
| Benin_97/1         | .....        | .....      | .....       | .....      | .....           | .....               | .....               | .....               | 716 |
| K49                | .....        | .....      | .....       | .....      | .....           | .....               | .....               | .....               | 720 |
| Mkuzi_1979         | .....        | .....      | .....       | .....      | .....           | .....               | .....               | .....               | 716 |
| OmLF2              | .....        | .....      | .....       | .....      | .....           | .....               | .....               | .....               | 716 |
| Ken.riel           | .....        | .....      | .....       | .....      | .....           | .....               | .....               | .....               | 716 |
| Uvira_B53          | .....        | .....      | .....       | .....      | .....           | .....               | I.....              | .....               | 716 |
| BUR/18/Rutana      | .....        | .....      | .....       | .....      | .....           | .....               | I.....              | .....               | 716 |
| Ken05/Tk1          | .....        | .....      | .....       | .....      | .....           | .....               | .....               | .....               | 716 |
| Kenya_1950         | .....        | .....      | .....       | .....      | .....           | .....               | .....               | .....               | 716 |
| Ken06.Bus          | .....        | .....      | .....       | .....      | .....           | .....               | .....               | .....               | 716 |
| Malawi_Lil-20/1    | .....        | .....      | .....       | .....      | .....           | .....               | .....               | E.....              | 716 |
| Conservation       |              |            |             |            |                 |                     |                     |                     |     |
|                    | 740          | 760        | 780         | 800        |                 |                     |                     |                     |     |
| G1211R_DR-1980     | CHEKVL L SMK | AMSTLCAEVN | EYLRQDN GTS | YLRMAYEEVL | FPVCF T G K K K | Y Y G I A H V N T P | N F N T K E L F I R | G I D I I K Q G Q T | 800 |
| RSA_2_2008         | .....        | .....      | .....       | .....      | .....           | .....               | .....               | .....               | 800 |
| SPEC_57            | .....        | .....      | .....       | .....      | .....           | .....               | .....               | .....               | 796 |
| Warmbaths          | .....        | .....      | .....       | .....      | .....           | .....               | .....               | .....               | 796 |
| RSA_2_2004         | .....        | .....      | .....       | .....      | .....           | .....               | .....               | .....               | 796 |
| Pretorisuskop/96/4 | .....        | .....      | .....       | .....      | .....           | .....               | .....               | .....               | 796 |
| Zaire              | .....        | .....      | .....       | .....      | .....           | .....               | .....               | .....               | 796 |
| Warthog            | .....        | .....      | R.....      | .....      | .....           | .....               | .....               | .....               | 796 |
| Tengani_62         | .....        | .....      | .....       | N.....     | .....           | .....               | .....               | .....               | 796 |
| MAL/19/Karonga     | .....        | .....      | .....       | .....      | .....           | .....               | .....               | .....               | 800 |
| GZ201801           | .....        | .....      | .....       | .....      | .....           | .....               | .....               | .....               | 800 |
| ASFV-G             | .....        | .....      | .....       | .....      | .....           | .....               | .....               | .....               | 800 |
| ASFV_Wuhan_2019-1  | .....        | .....      | .....       | .....      | .....           | .....               | .....               | .....               | 796 |
| E75                | .....        | .....      | .....       | .....      | .....           | .....               | .....               | .....               | 800 |
| OURT_88/3          | .....        | .....      | .....       | .....      | .....           | .....               | .....               | .....               | 800 |
| Benin_97/1         | .....        | .....      | .....       | .....      | .....           | .....               | .....               | .....               | 796 |
| K49                | .....        | .....      | .....       | .....      | .....           | .....               | .....               | .....               | 800 |
| Mkuzi_1979         | .....        | .....      | .....       | .....      | .....           | .....               | .....               | .....               | 796 |
| OmLF2              | .....        | .....      | .....       | .....      | .....           | .....               | .....               | .....               | 796 |
| Ken.riel           | .....        | .....      | .....       | .....      | .....           | .....               | .....               | .....               | 796 |
| Uvira_B53          | .....        | .....      | .....       | .....      | .....           | .....               | .....               | .....               | 796 |
| BUR/18/Rutana      | .....        | .....      | .....       | .....      | .....           | .....               | .....               | .....               | 796 |
| Ken05/Tk1          | .....        | I.....     | .....       | .....      | .....           | .....               | .....               | .....               | 796 |
| Kenya_1950         | .....        | .....      | .....       | .....      | .....           | .....               | .....               | .....               | 796 |
| Ken06.Bus          | .....        | .....      | .....       | .....      | .....           | .....               | .....               | .....               | 796 |
| Malawi_Lil-20/1    | .....        | .....      | .....       | .....      | .....           | .....               | .....               | .....               | 796 |
| Conservation       |              |            |             |            |                 |                     |                     |                     |     |





# G1211R Alignment

|                    | 980         | 1,000       | 1,020      | 1,040      |            |            |            |            |      |
|--------------------|-------------|-------------|------------|------------|------------|------------|------------|------------|------|
| G1211R_DR-1980     | EEFQPPDNVS  | NKDEYAQRRA  | KSYLQKFVQS | IHPKDKSVIK | QGIVHRQCYK | YVHQEIKKKI | GIFADLYKEF | FNNTTNPIES | 1039 |
| RSA_2_2008         | .....       | .....       | .....      | .....      | .....      | .....      | .....      | .....      | 1039 |
| SPEC_57            | .....       | .....       | .....      | .....      | .....      | .....      | .....      | .....      | 1035 |
| Warmbaths          | .....       | .....       | .....      | .....      | .....      | .....      | .....      | .....      | 1035 |
| RSA_2_2004         | .....       | .....       | .....      | .....      | .....      | .....      | .....      | .....      | 1035 |
| Pretorisuskop/96/4 | .....       | .....       | .....      | .....      | .....      | .....      | .....      | .....      | 1035 |
| Zaire              | .....       | .....       | .....      | .....      | .....      | .....      | .....      | .....      | 1035 |
| Warthog            | .....       | .....       | .....      | .....      | .....      | .....      | .....      | .....      | 1035 |
| Tengani_62         | .....       | .....       | .....      | .....      | .....      | I.....     | .....      | .....      | 1035 |
| MAL/19/Karonga     | .....       | .....       | .....      | .....      | .....      | I.....     | .....      | .....      | 1039 |
| GZ201801           | .....       | .....       | .....      | .....      | .....      | N.....     | I.....     | .....      | 1039 |
| ASFV-G             | .....       | .....       | .....      | .....      | .....      | N.....     | I.....     | .....      | 1039 |
| ASFV_Wuhan_2019-1  | .....       | .....       | .....      | .....      | .....      | N.....     | I.....     | .....      | 1035 |
| E75                | .....       | .....       | .....      | .....      | .....      | .....      | .....      | .....      | 1039 |
| OURT_88/3          | .....       | .....       | .....      | .....      | .....      | .....      | .....      | .....      | 1039 |
| Benin_97/1         | .....       | .....       | .....      | .....      | .....      | .....      | .....      | .....      | 1035 |
| K49                | .....       | .....       | .....      | .....      | .....      | .....      | .....      | .....      | 1039 |
| Mkuzi_1979         | .....       | .....       | .....      | .....      | .....      | .....      | .....      | .....      | 1035 |
| OmLF2              | .....       | .....       | .....      | .....      | .....      | .....      | .....      | .....      | 1035 |
| Ken.riel           | .....G..... | .....       | .....      | .....      | .....      | .....      | .....      | .....      | 1035 |
| Uvira_B53          | .....G..... | .....       | .....      | .....      | .....      | .....      | .....      | .....      | 1036 |
| BUR/18/Rutana      | .....G..... | .....       | .....      | .....      | .....      | .....      | .....      | .....      | 1036 |
| Ken05/Tk1          | .....G..... | .....       | .....      | .....      | .....      | .....      | .....      | .....      | 1036 |
| Kenya_1950         | .....G..... | .....       | .....      | .....      | .....      | .....      | .....      | .....      | 1036 |
| Ken06.Bus          | .....G..... | .....       | .....      | .....      | .....      | .....      | .....      | .....      | 1036 |
| Malawi_Lil-20/1    | .....       | .....       | .....      | .....      | .....      | .....      | .....      | .....      | 1035 |
| Conservation       |             |             |            |            |            |            |            |            |      |
|                    | 1,060       | 1,080       | 1,100      | 1,120      |            |            |            |            |      |
| G1211R_DR-1980     | FIQSARFMIQ  | YSDGEQKVNH  | SMKKMVEQRA | TLASKPAGKP | AGNPAGNPAG | N-----A    | LMRAIFTQLI | TEBKKIVQAL | 1111 |
| RSA_2_2008         | ...TQ...F   | .....I..H   | ..ASN      | ---S       | .....      | -----      | .....      | .....      | 1106 |
| SPEC_57            | ...TQ...F   | .....I..H   | ..ASN      | ---S       | .....      | -----      | .....      | .....      | 1102 |
| Warmbaths          | ...TQ...F   | .....I..H   | ..ASN      | ---S       | .....      | -----      | .....      | .....      | 1102 |
| RSA_2_2004         | ...TQ...F   | .....I..H   | ..ASN      | ---S       | .....      | -----      | .....      | .....      | 1102 |
| Pretorisuskop/96/4 | ...TQ...F   | .....I..H   | ..ASN      | ---        | .....      | -----      | .....      | .....      | 1102 |
| Zaire              | ...TQ...F   | .....I..H   | ..ASN      | ---        | .....      | -----      | .....      | .....      | 1098 |
| Warthog            | ...TQ...F   | .....H      | ..S        | ---        | .....      | -----      | .....      | .....      | 1099 |
| Tengani_62         | ...TQ...F   | .....H      | ..ATN      | ---        | .....      | -----      | .....      | .....      | 1102 |
| MAL/19/Karonga     | ...TQ...F   | .....H      | ..ASN      | ---        | .....      | -----      | .....      | .....      | 1106 |
| GZ201801           | ...TQ...F   | .....H      | ..ASN      | ---        | .....      | -----      | .....      | .....      | 1106 |
| ASFV-G             | ...TQ...F   | .....H      | ..ASN      | ---        | .....      | -----      | .....      | .....      | 1106 |
| ASFV_Wuhan_2019-1  | ...TQ...F   | .....H      | ..ASN      | ---        | .....      | -----      | .....      | .....      | 1102 |
| E75                | .....       | .....       | .....      | .....      | .....      | -----      | .....      | .....      | 1111 |
| OURT_88/3          | .....       | .....       | .....      | .....      | .....      | -----      | .....      | .....      | 1111 |
| Benin_97/1         | .....       | .....       | .....      | .....      | .....      | -----      | .....      | .....      | 1107 |
| K49                | .....       | .....       | .....      | .....      | .....      | -----      | .....      | .....      | 1107 |
| Mkuzi_1979         | ...Q...     | .....       | .....      | .....      | .....      | -----      | .....      | .....      | 1103 |
| OmLF2              | ...Q...     | .....       | .....      | .....      | .....      | -----      | .....      | .....      | 1103 |
| Ken.riel           | ...TQ...H   | F.E.....    | .....H     | A.---      | .....      | -----      | PAGNPASN   | .....      | 1107 |
| Uvira_B53          | ...TQ...H   | F.E.....    | .....H     | A.---      | .....      | -----      | PA...SN    | .....      | 1104 |
| BUR/18/Rutana      | ...TQ...H   | F.E.....    | .....H     | A.---      | .....      | -----      | -----      | .....      | 1096 |
| Ken05/Tk1          | ...TQ...H   | F.E.....    | .....H     | A.---      | .....      | -----      | -----      | .....      | 1096 |
| Kenya_1950         | ...TQ...H   | F.E.....    | .....H     | A.---      | .....      | -----      | .....      | V.....     | 1096 |
| Ken06.Bus          | ...TQ...H   | F.E.....    | .....T     | ---        | .....      | -----      | PA...SN    | .....      | 1104 |
| Malawi_Lil-20/1    | ...TQ...E   | .....V..... | .....H     | ..ASN      | ---N       | -----      | -----      | .....      | 1106 |
| Conservation       |             |             |            |            |            |            |            |            |      |

# G1211R Alignment

|                    | 1,140                                            | 1,160                  | 1,180                                | 1,200                                 |                                     |                                      |                                      |                                                  |      |
|--------------------|--------------------------------------------------|------------------------|--------------------------------------|---------------------------------------|-------------------------------------|--------------------------------------|--------------------------------------|--------------------------------------------------|------|
| G1211R_DR-1980     | YNKGD <del>A</del> I <del>H</del> D <del>L</del> | LTYIINNIN <del>Y</del> | KIATFQ <del>T</del> K <del>Q</del> M | LTFEFS <del>S</del> ST <del>H</del> V | ELLLKLN <del>K</del> T <del>W</del> | LILAGI <del>H</del> V <del>A</del> K | KHLQAL <del>L</del> D <del>S</del> Y | NNEPP <del>S</del> R <del>T</del> F <del>I</del> | 1191 |
| RSA_2_2008         | .....                                            | .....                  | .....                                | .....                                 | .....                               | .....                                | .....                                | .....                                            | 1186 |
| SPEC_57            | .....                                            | .....                  | .....                                | .....                                 | .....                               | .....                                | .....                                | .....                                            | 1182 |
| Warmbaths          | .....                                            | .....                  | .....                                | .....                                 | .....                               | .....                                | .....                                | .....                                            | 1182 |
| RSA_2_2004         | .....                                            | .....                  | .....                                | .....                                 | .....                               | .....                                | .....                                | .....K                                           | 1182 |
| Pretorisuskop/96/4 | .....                                            | .....                  | .....                                | .....                                 | .....                               | .....                                | .....                                | .....K                                           | 1182 |
| Zaire              | .....                                            | .....                  | .....                                | .....                                 | .....                               | .....                                | .....                                | .....K                                           | 1178 |
| Warthog            | .....                                            | .....                  | .....                                | .....                                 | .....                               | .....                                | .....                                | .....                                            | 1179 |
| Tengani_62         | .....                                            | .....                  | .....                                | .....                                 | .....                               | .....                                | .....F                               | .....K                                           | 1182 |
| MAL/19/Karonga     | .....                                            | .....                  | .....                                | .....                                 | .....                               | .....                                | .....F                               | .....S                                           | 1186 |
| GZ201801           | .....                                            | .....                  | .....                                | .....                                 | .....                               | .....                                | .....F                               | .....S                                           | 1186 |
| ASFV-G             | .....                                            | .....                  | .....                                | .....                                 | .....                               | .....                                | .....F                               | .....S                                           | 1186 |
| ASFV_Wuhan_2019-1  | .....                                            | .....                  | .....                                | .....                                 | .....                               | .....                                | .....F                               | .....S                                           | 1182 |
| E75                | .....                                            | .....                  | .....                                | .....                                 | .....                               | .....                                | .....                                | .....                                            | 1191 |
| OURT_88/3          | .....                                            | .....                  | .....                                | .....                                 | .....                               | .....                                | .....                                | .....                                            | 1191 |
| Benin_97/1         | .....                                            | .....                  | .....                                | .....                                 | .....                               | .....                                | .....                                | .....                                            | 1187 |
| K49                | .....                                            | .....                  | .....                                | .....                                 | .....                               | .....                                | .....                                | .....                                            | 1187 |
| Mkuzi_1979         | .....                                            | .....                  | .....                                | .....                                 | .....                               | .....                                | .....                                | .....                                            | 1183 |
| OmLF2              | .....                                            | .....                  | .....                                | .....                                 | .....                               | .....                                | .....                                | .....                                            | 1183 |
| Ken.riel           | .....E.....                                      | .....S.....            | .....L.....                          | .....I.....                           | .....V.....                         | .....H.....                          | .....V.....                          | .....GLS.....                                    | 1187 |
| Uvira_B53          | .....E.....                                      | .....                  | .....L.....                          | .....                                 | .....V.....                         | .....H.....                          | .....V.....                          | .....GLS.....                                    | 1184 |
| BUR/18/Rutana      | .....E.....                                      | .....                  | .....L.....                          | .....                                 | .....V.....                         | .....H.....                          | .....V.....                          | .....GLS.....                                    | 1176 |
| Ken05/Tk1          | .....E.....                                      | .....                  | .....L.....                          | .....                                 | .....V.....                         | .....H.....                          | .....V.....                          | .....GLS.....                                    | 1176 |
| Kenya_1950         | .....E.....                                      | .....                  | .....L.....                          | .....                                 | .....V.....                         | .....H.....                          | .....V.....                          | .....GLS.....                                    | 1176 |
| Ken06.Bus          | .....                                            | .....S.....            | .....L.....                          | .....                                 | .....V.....                         | .....H.....                          | .....T.....                          | .....GLS.....                                    | 1184 |
| Malawi_Lil-20/1    | .....S.....                                      | .....E.....            | .....L.....                          | .....                                 | .....V.....                         | .....T.....                          | .....                                | .....K.....                                      | 1186 |
| Conservation       |                                                  |                        |                                      |                                       |                                     |                                      |                                      |                                                  |      |

|                    | 1,220             |                 |
|--------------------|-------------------|-----------------|
| G1211R_DR-1980     | QQAIEEECGS        | IKPSCYDFIS 1211 |
| RSA_2_2008         | .....             | 1206            |
| SPEC_57            | .....             | 1202            |
| Warmbaths          | .....             | 1202            |
| RSA_2_2004         | .....             | 1202            |
| Pretorisuskop/96/4 | .....             | 1202            |
| Zaire              | .....             | 1198            |
| Warthog            | .....             | 1199            |
| Tengani_62         | .....             | 1202            |
| MAL/19/Karonga     | .....             | 1206            |
| GZ201801           | .....             | 1206            |
| ASFV-G             | .....             | 1206            |
| ASFV_Wuhan_2019-1  | .....             | 1202            |
| E75                | .....             | 1211            |
| OURT_88/3          | .....             | 1211            |
| Benin_97/1         | .....             | 1207            |
| K49                | .....             | 1207            |
| Mkuzi_1979         | .....             | 1203            |
| OmLF2              | .....             | 1203            |
| Ken.riel           | .....             | 1207            |
| Uvira_B53          | .....             | 1204            |
| BUR/18/Rutana      | .....             | 1196            |
| Ken05/Tk1          | .....             | 1196            |
| Kenya_1950         | .....             | 1196            |
| Ken06.Bus          | .....             | 1204            |
| Malawi_Lil-20/1    | .....K.....S..... | 1206            |
| Conservation       |                   |                 |

# I215L Alignment

|                    |                   |                         |              |                   |                         |                          |                   |            |     |
|--------------------|-------------------|-------------------------|--------------|-------------------|-------------------------|--------------------------|-------------------|------------|-----|
|                    |                   | 20                      |              | 40                |                         | 60                       |                   | 80         |     |
| I215L_DR-1980      | MVSRFLIAEY        | RHLIENPSEN              | FKISVNENNI   | TEWDVILRGP        | PDTLYEGGLF              | KAKVAFPPEY               | PYAPPKLTFT        | SEMWHPNLYP | 80  |
| E75                | .....             | .....                   | .....        | .....             | .....                   | .....                    | .....             | .....      | 80  |
| OURT_88/3          | .....             | .....                   | .....        | .....             | .....                   | .....                    | .....             | .....      | 80  |
| LO2018_minor       | .....             | .....                   | .....        | .....             | .....                   | .....                    | .....             | .....      | 80  |
| K49                | .....             | .....                   | .....        | .....             | .....                   | .....                    | .....             | .....      | 80  |
| Arm/07/CBM/c4      | .....             | .....                   | .....        | .....             | .....F.....             | .....I.....              | .....             | .....      | 80  |
| Warthog            | .....             | .....                   | .....DM      | .....             | .....                   | .....                    | .....R.....       | .....      | 80  |
| Mkuzi_1979         | .....             | .....                   | .....M       | .....             | .....                   | .....                    | .....R.....       | .....S     | 80  |
| OmLF2              | .....             | .....                   | .....        | .....             | .....                   | .....                    | .....R.....       | .....S     | 80  |
| Warmbaths          | .....             | .....                   | .....DM      | .....             | .....                   | .....                    | .....R.....       | .....      | 80  |
| Georgia_2007/1     | .....             | .....                   | .....KDM     | .....             | .....F.....             | .....I.....              | .....R.....       | .....S     | 80  |
| Tengani_62         | .....             | .....                   | .....V.....L | .....             | .....F.....             | .....                    | .....R.....       | .....S     | 80  |
| Pretorisuskop/96/4 | .....             | .....T.....V.....M      | .....        | .....K.....A..... | .....                   | .....IG.....N.....       | .....E.....R..... | .....S     | 80  |
| Malawi_Lil-20/1    | .....S.....L..... | KN.....V.....H          | .....D.....L | .....             | .....K.....             | .....IV.....K.....       | .....E.....R..... | .....S     | 80  |
| Ken05/Tk1          | .....LT.....      | N.....T.....H           | .....V.....L | .....             | .....K.....             | .....F.....IT.....N..... | .....E.....       | .....S     | 80  |
| Ken05/Tk1          | .....LT.....      | N.....T.....H           | .....V.....L | .....             | .....K.....             | .....F.....IT.....N..... | .....E.....       | .....S     | 80  |
| Ken.riel           | .....LT.....      | N.....T.....H           | .....V.....L | .....             | .....K.....             | .....F.....IT.....N..... | .....E.....       | .....S     | 80  |
| Uvira_B53          | .....LT.....      | N.....T.....H           | .....V.....L | .....             | .....K.....             | .....F.....IT.....N..... | .....E.....       | .....S     | 80  |
| BUR/18/Rutana      | .....LT.....      | N.....T.....H           | .....V.....L | .....             | .....K.....             | .....F.....IT.....N..... | .....E.....       | .....S     | 80  |
| Kenya_1950         | .....LT.....      | N.....T.....H           | .....V.....L | .....             | .....K.....S.....F..... | .....IT.....N.....       | .....E.....       | .....S     | 80  |
| Ken06.Bus          | .....L.....       | N.....T.....            | .....V.....L | .....             | .....K.....             | .....F.....IN.....N..... | .....E.....I..... | .....A     | 80  |
| Conservation       |                   |                         |              |                   |                         |                          |                   |            |     |
|                    |                   | 100                     |              | 120               |                         | 140                      |                   | 160        |     |
| I215L_DR-1980      | DGRLCISILH        | GDNAEEQGMT              | WSPAQKIDTI   | LLSVISLLNE        | PNPDSPANVD              | AAKSRYKQVY               | KEDLESYPME        | VKKTVKKSLD | 160 |
| E75                | .....             | .....                   | .....        | .....             | .....                   | .....                    | .....             | .....      | 160 |
| OURT_88/3          | .....             | .....G.....             | .....        | .....             | .....                   | .....                    | .....             | .....      | 160 |
| LO2018_minor       | .....             | .....                   | .....        | .....             | .....                   | .....C.....              | .....             | .....      | 160 |
| K49                | .....             | .....                   | .....        | .....             | .....                   | .....R.....              | .....             | .....      | 160 |
| Arm/07/CBM/c4      | .....             | .....                   | .....        | .....             | .....                   | .....LL.....             | .....             | .....      | 160 |
| Warthog            | .....             | .....                   | .....        | .....             | .....                   | .....LMH                 | .....R.....       | .....      | 160 |
| Mkuzi_1979         | .....             | .....                   | .....        | .....             | .....                   | .....LMH                 | .....R.....       | .....      | 160 |
| OmLF2              | .....             | .....                   | .....        | .....             | .....                   | .....R.....H             | .....             | .....      | 160 |
| Warmbaths          | .....             | .....                   | .....        | .....             | .....                   | .....FL.....             | .....             | .....      | 160 |
| Georgia_2007/1     | .....             | .....                   | .....        | .....             | .....                   | .....LL.....             | .....R.....       | .....      | 160 |
| Tengani_62         | .....             | .....                   | .....V.....V | .....             | .....                   | .....L.....              | .....R.....       | .....      | 160 |
| Pretorisuskop/96/4 | .....             | .....V.....             | .....V.....  | .....             | .....T.....             | .....RF.....H            | .....R.....       | .....      | 160 |
| Malawi_Lil-20/1    | .....             | .....                   | .....V.....  | .....             | .....                   | .....L.....              | .....             | .....      | 160 |
| Ken05/Tk1          | .....             | .....T.....R.....       | .....E.....V | .....             | .....F.....T.....       | .....LMH                 | .....             | .....      | 160 |
| Ken05/Tk1          | .....             | .....T.....R.....       | .....E.....V | .....             | .....F.....T.....       | .....LMH                 | .....             | .....      | 160 |
| Ken.riel           | .....             | .....T.....V.....R..... | .....E.....V | .....             | .....F.....T.....       | .....LMH                 | .....             | .....      | 160 |
| Uvira_B53          | .....             | .....T.....V.....R..... | .....E.....V | .....             | .....F.....T.....       | .....LMH                 | .....             | .....      | 160 |
| BUR/18/Rutana      | .....             | .....T.....V.....R..... | .....E.....V | .....             | .....F.....T.....       | .....LMH                 | .....             | .....      | 160 |
| Kenya_1950         | .....             | .....T.....V.....R..... | .....E.....V | .....             | .....F.....T.....       | .....LMH                 | .....             | .....      | 160 |
| Ken06.Bus          | .....             | .....T.....P.....R..... | .....E.....V | .....             | .....F.....T.....       | .....FMH.....A.....      | .....             | .....      | 160 |
| Conservation       |                   |                         |              |                   |                         |                          |                   |            |     |
|                    |                   | 180                     |              | 200               |                         | 220                      |                   |            |     |
| I215L_DR-1980      | ECSPEDIEYF        | KNAASNVPPI              | PSDAYED      | EE                | CEEMEDDTYI              | LTYDD                    | EEEEDEEM          | DDE        | 214 |
| E75                | .....             | .....                   | ---          | ---               | ---                     | ---                      | ---               | ---        | 215 |
| OURT_88/3          | .....             | .....                   | ---          | ---               | ---                     | ---                      | ---               | ---        | 215 |
| LO2018_minor       | .....             | .....                   | ---          | ---               | ---                     | ---                      | ---               | ---        | 215 |
| K49                | .....             | .....                   | ---          | ---               | ---                     | ---                      | ---               | ---        | 214 |
| Arm/07/CBM/c4      | .....             | .....                   | ---          | ---               | ---                     | ---                      | ---               | ---        | 215 |
| Warthog            | .....             | .....V.....A.....       | ---          | ---               | ---                     | ---                      | ---               | ---        | 221 |
| Mkuzi_1979         | .....             | .....                   | ---          | ---               | ---                     | ---                      | ---               | ---        | 215 |
| OmLF2              | .....             | .....                   | ---          | ---               | ---                     | ---                      | ---               | ---        | 215 |
| Warmbaths          | .....             | .....V.....             | ---          | ---               | ---                     | ---                      | ---               | ---        | 216 |
| Georgia_2007/1     | .....             | .....                   | ---          | ---               | ---                     | ---                      | ---               | ---        | 212 |
| Tengani_62         | .....             | .....D.....             | ---          | ---               | ---                     | ---                      | ---               | ---        | 214 |
| Pretorisuskop/96/4 | .....             | .....                   | ---          | ---               | ---                     | ---                      | ---               | ---        | 217 |
| Malawi_Lil-20/1    | .....             | .....VPV.....L.....V    | .....D.....  | ---               | ---                     | ---                      | ---               | ---        | 213 |
| Ken05/Tk1          | .....             | .....VF.....A.....      | ---          | ---               | ---                     | ---                      | ---               | ---        | 216 |
| Ken05/Tk1          | .....             | .....VF.....A.....      | ---          | ---               | ---                     | ---                      | ---               | ---        | 216 |
| Ken.riel           | .....             | .....VF.....A.....      | ---          | ---               | ---                     | ---                      | ---               | ---        | 216 |
| Uvira_B53          | .....             | .....VF.....A.....      | ---          | ---               | ---                     | ---                      | ---               | ---        | 218 |
| BUR/18/Rutana      | .....             | .....VF.....A.....      | ---          | ---               | ---                     | ---                      | ---               | ---        | 216 |
| Kenya_1950         | .....             | .....VF.....A.....      | ---          | ---               | ---                     | ---                      | ---               | ---        | 218 |
| Ken06.Bus          | .....             | .....TF.....A.....      | ---          | ---               | ---                     | ---                      | ---               | ---        | 217 |
| Conservation       |                   |                         |              |                   |                         |                          |                   |            |     |

# Alignment of DP93R & KP93L

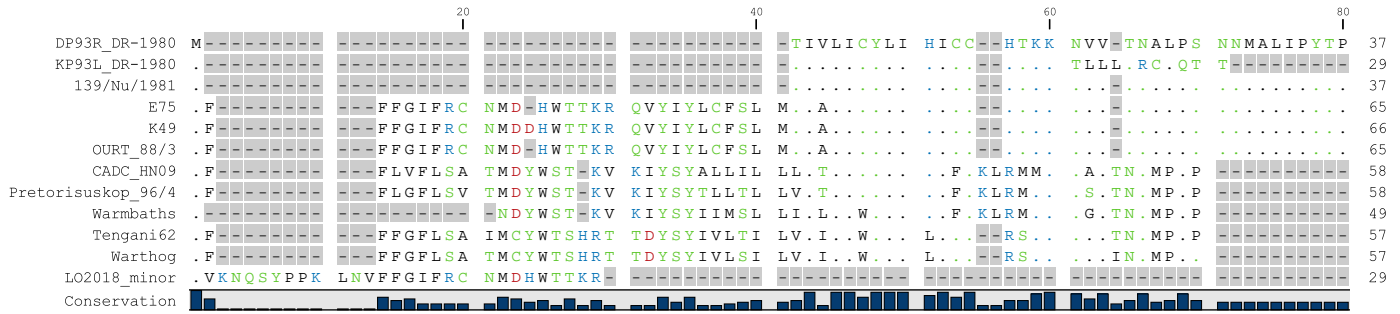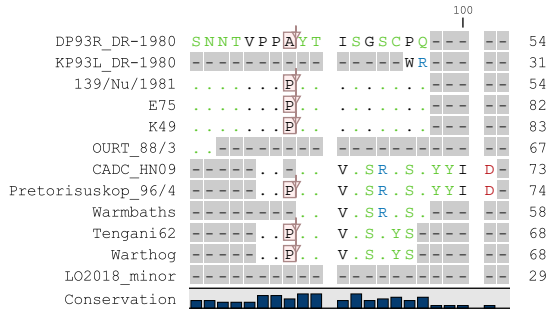



# MGF360-12L Alignment

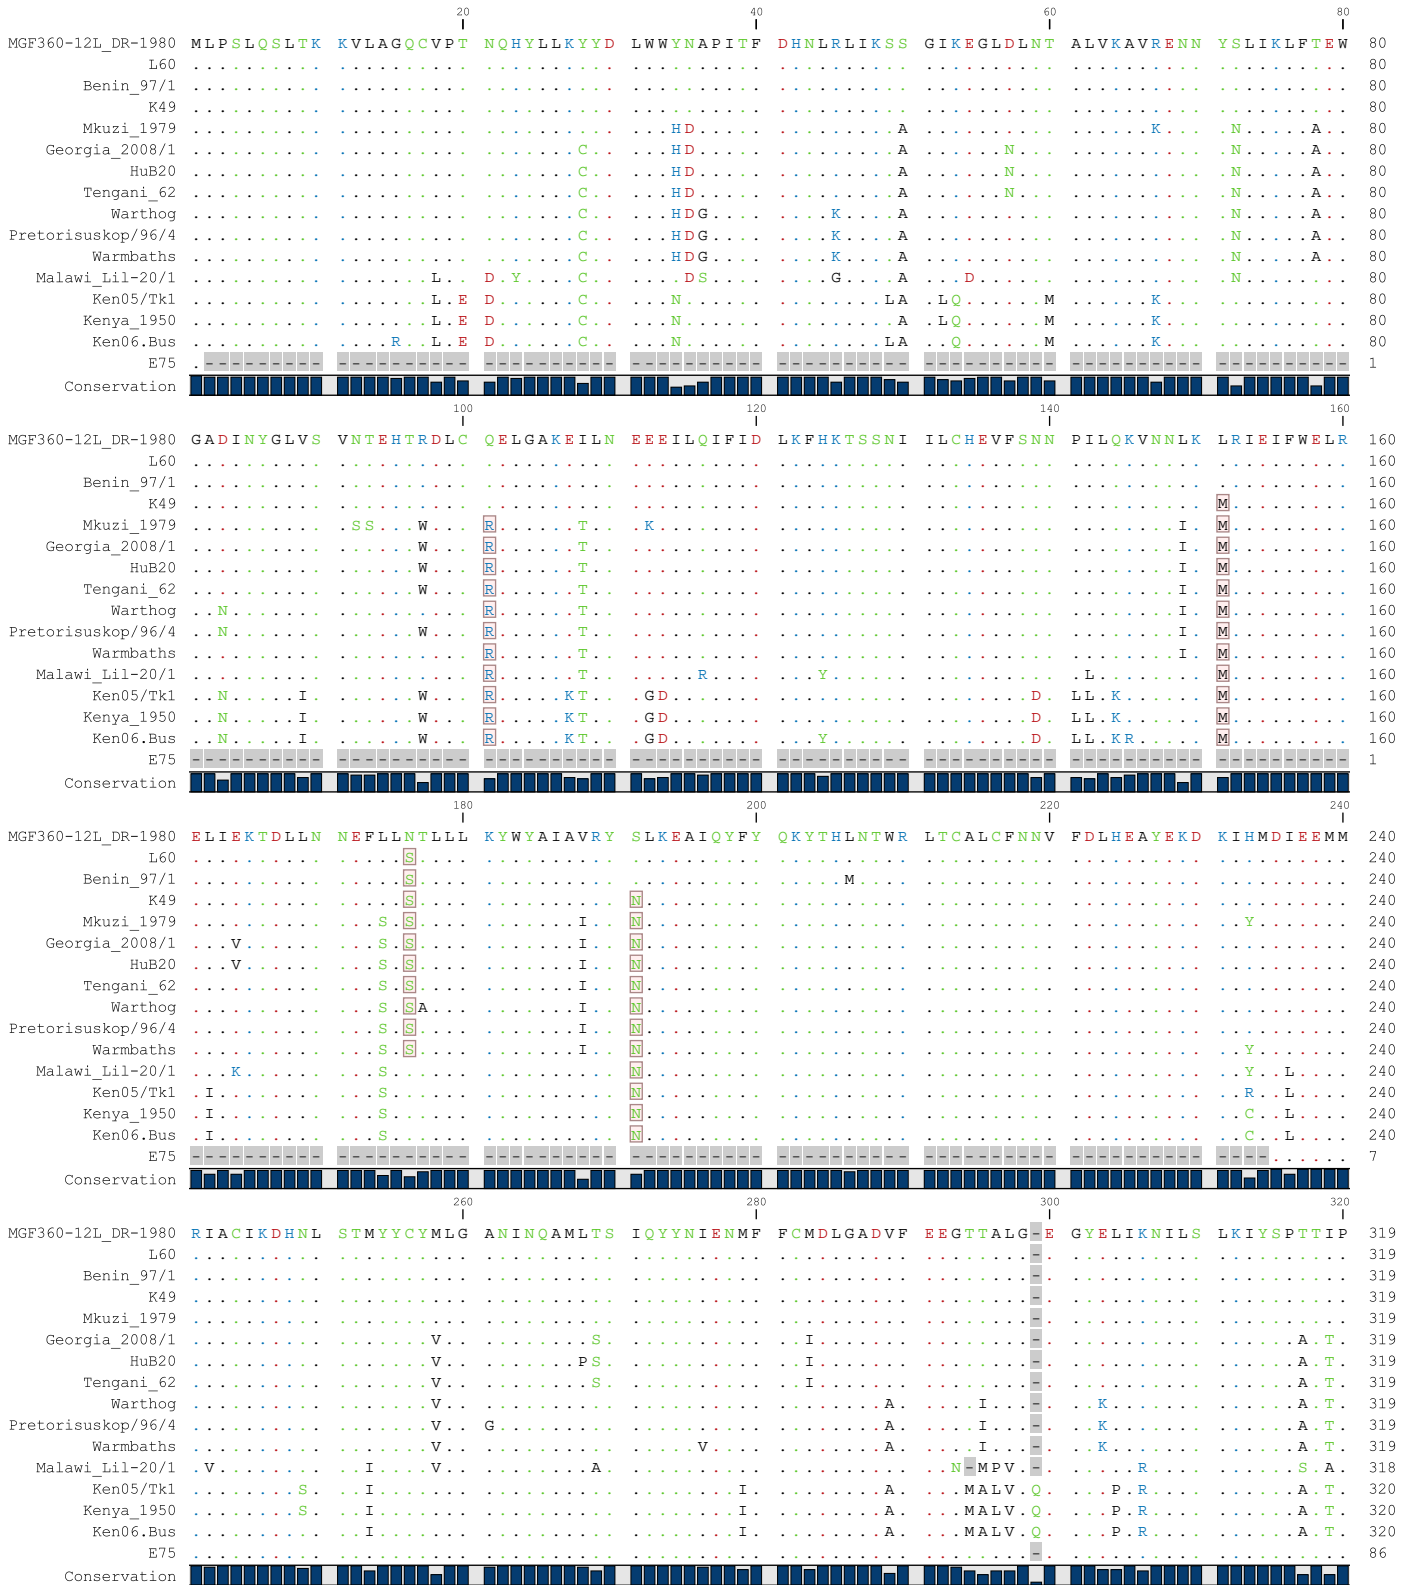

# MGF360-12L Alignment

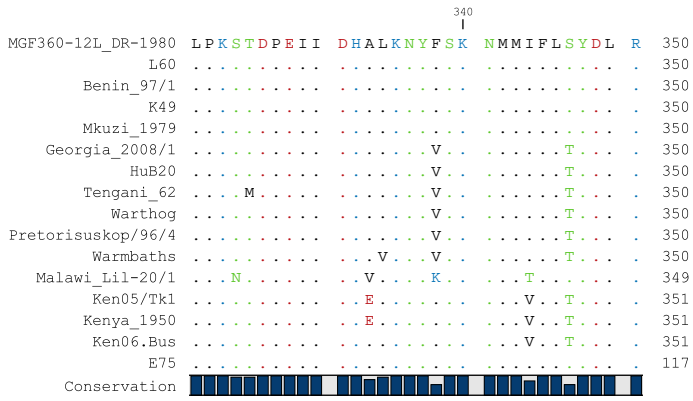

Supplemental Figure 1: Amino acid sequence alignments of CP2475L, G1211R, I215L, KP93L & DP93R, L60L, and MGF 360-12L originating from various sequenced isolates and DR-1980. Unique amino acids within the DR-1980 isolate are highlighted.
